# Supplementary material
Source: PubMed Central journal article supplement (PMC11525942)
Supplement: hei-2024-219-s001.pdf [file hei-2024-219-s001.pdf]

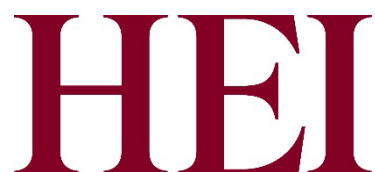

## SUPPLEMENTARY APPENDIX

### Research Report 219

# Birth Cohort Studies of Long-Term Exposure to Ambient Air Pollution in Early Life and Development of Asthma in Children and Adolescents from Denmark

Marie Pedersen et al.

## Appendix A: Supplementary Figures and Tables

This Appendix was reviewed solely for spelling, grammar, and cross-references to the main text. It has not been formatted or fully edited by HEI. This document was reviewed by the HEI Review Committee.

---

Correspondence may be addressed to Dr. Marie Pedersen, University of Copenhagen, Department of Public Health, Section of Epidemiology, Øster Farimagsgade 5, DK-1353 Copenhagen K, Denmark;  
email: [mp@sund.ku.dk](mailto:mp@sund.ku.dk).

Although this document was produced with partial funding by the United States Environmental Protection Agency under Assistance Award CR-83998101 to the Health Effects Institute, it has not been subjected to the Agency's peer and administrative review and therefore may not necessarily reflect the views of the Agency, and no official endorsement by it should be inferred. The contents of this document also have not been reviewed by private party institutions, including those that support the Health Effects Institute; therefore, it may not reflect the views or policies of these parties, and no endorsement by them should be inferred.

© 2024 Health Effects Institute, 75 Federal Street, Suite 1400, Boston, MA 02110

## Contents

|                                                                                                                                                                                                                                                                     |    |
|---------------------------------------------------------------------------------------------------------------------------------------------------------------------------------------------------------------------------------------------------------------------|----|
| Figure A1. Directed Acyclic Graph (DAG) of the relationship between air pollution and asthma .....                                                                                                                                                                  | 2  |
| Figure A2. Geographical locations of the home residences of the included children participating in the Birth Cohort Studies of Long-Term Exposure to Ambient Air Pollution in Early Life and Development of Asthma in Children and Adolescents Born in Denmark..... | 3  |
| Figure A3. Annual ambient air pollution exposure concentration ( $\mu\text{g}/\text{m}^3$ ) distribution over time in the nationwide cohort of 1,060,154 children born in Denmark, 1998–2016.....                                                                   | 4  |
| Figure A4. Study population flow-chart of the Danish National Birth Cohort (DNBC).....                                                                                                                                                                              | 10 |
| Table A1. Correlation Coefficients between Modeled and Measured Pollutants in Ambient Air in Denmark .....                                                                                                                                                          | 11 |
| Table A2. Study Population Characteristics of the Participants of the Birth Cohort Studies of Long-term Exposure to Ambient Air Pollution in Early Life and Development of Asthma in Children and Adolescents Born in Denmark, 1998–2016 .....                      | 12 |
| Table A3. Prenatal Exposure to Ambient Air Pollution Concentrations ( $\mu\text{g}/\text{m}^3$ ) of the Children Born in Denmark, 1998–2016.....                                                                                                                    | 13 |
| Table A4. Spearman Correlation Coefficients between Ambient Air Pollutant Concentrations During the Prenatal Periods for the Children Born in Denmark, 1998–2016.....                                                                                               | 14 |
| Table A5. Spearman Correlation Coefficients between Prenatal and Postnatal Exposure Concentrations for the Children Born in Denmark, 1998–2016.....                                                                                                                 | 15 |
| Table A6. Associations between Prenatal Exposure to Ambient Air Pollution and Asthma Incidence After Age 4 in the Nationwide Cohort of Children Born in Denmark, 1998–2016.....                                                                                     | 17 |
| Table A7. Sensitivity Analyses of Associations between Air Pollution and Asthma Incidence in the Nationwide Cohort of Children Born in Denmark, 1998–2016 .....                                                                                                     | 18 |
| Table A8. Associations between Prenatal Exposure to Air Pollution and Asthma Incidence by Sex in the Nationwide Cohort of Children Born in Denmark, 1998–2016 .....                                                                                                 | 19 |
| Table A9. Study Population Characteristics of Excluded vs. Included and Nonmovers vs. Movers of the Danish National Birth Cohort (DNBC).....                                                                                                                        | 20 |
| Table A10. Sensitivity Analysis Restricted to Nonmovers of the Danish National Birth Cohort (DNBC).....                                                                                                                                                             | 22 |
| Table A11. Sensitivity Analysis Estimating Relative Risks and their 95% Confidence Intervals for the Associations between Prenatal and Postnatal Exposure to Air Pollution and Asthma (Parental Recall) Prevalence in the Danish National Birth Cohort (DNBC) ..... | 23 |

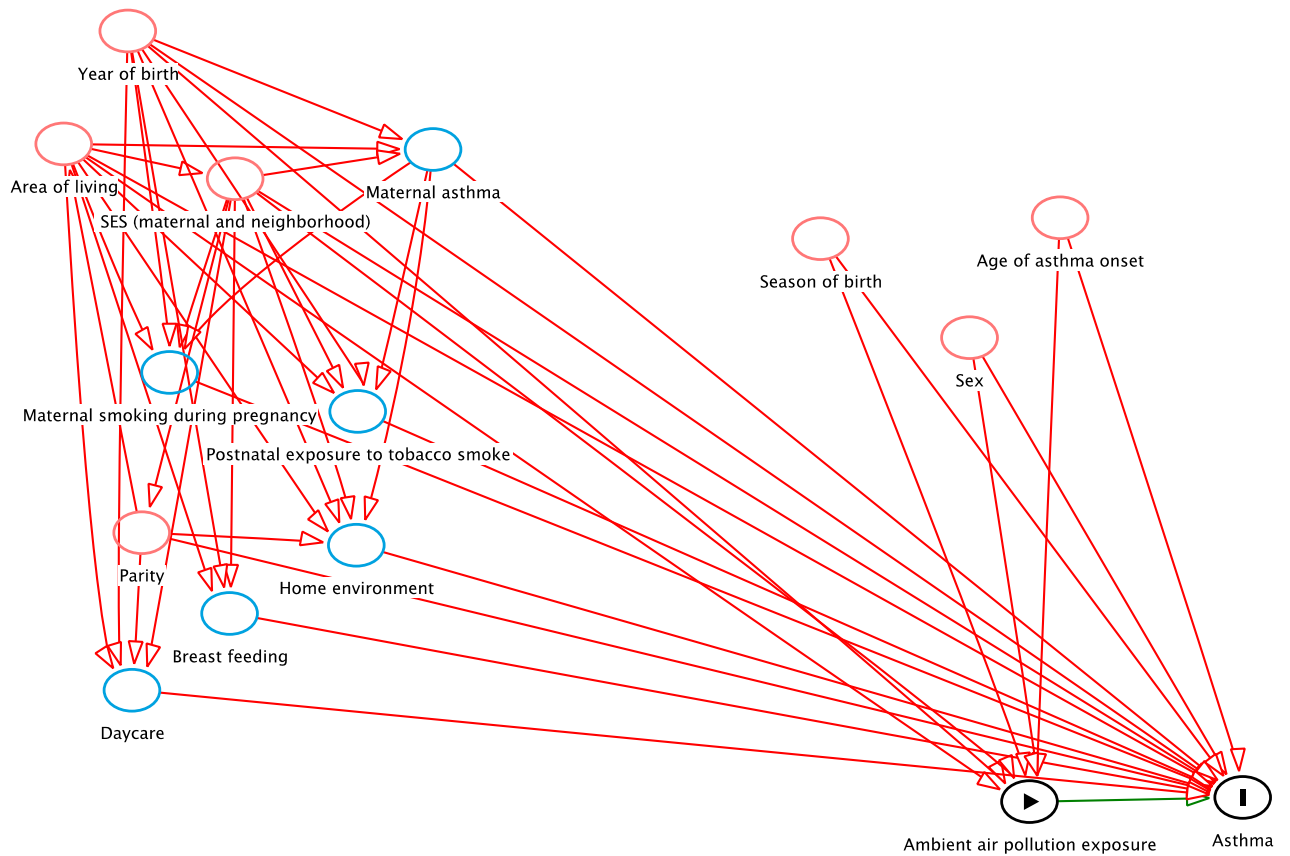

**Figure A1. Directed Acyclic Graph (DAG) of the relationship between air pollution and asthma.** The minimum set of covariates that should be controlled for are those marked with red. However, because some of the variables available may not perfectly capture the underlying factors that we aim to control for, we tested different levels of adjustment and potential effect modification whenever possible. Please note that the DAG is simplified. There are many more plausible arrows. For instance, maternal asthma may influence area of living; ambient air pollution may also determinate maternal asthma. Asthma refers to all asthma outcomes investigated. Year and season of birth refer to the child. Home environment refers to indoor home environment (e.g., mold, gas cooking, wood stoves). Although some of these could be determinants of the modeled ambient air pollution (e.g., wood stoves) others are not (e.g., mold and dampness). Furthermore, grouping all of the air pollutants together in one DAG makes confounding of a specific pollutant–asthma association by copollutants difficult to specify on the DAG. Ideally, each specific pollutant–outcome association would have its own DAG.

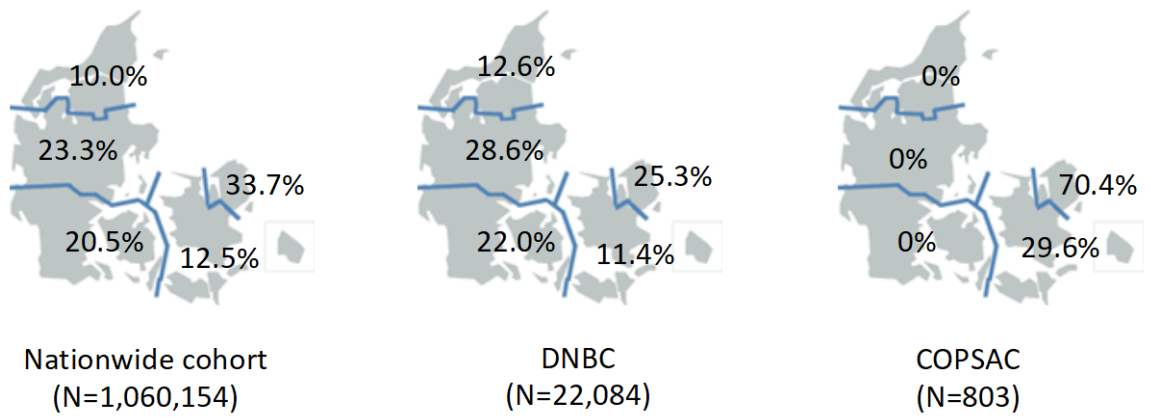

**Figure A2. Geographical locations of the home residences of the included children participating in the Birth Cohort Studies of Long-Term Exposure to Ambient Air Pollution in Early Life and Development of Asthma in Children and Adolescents Born in Denmark.**

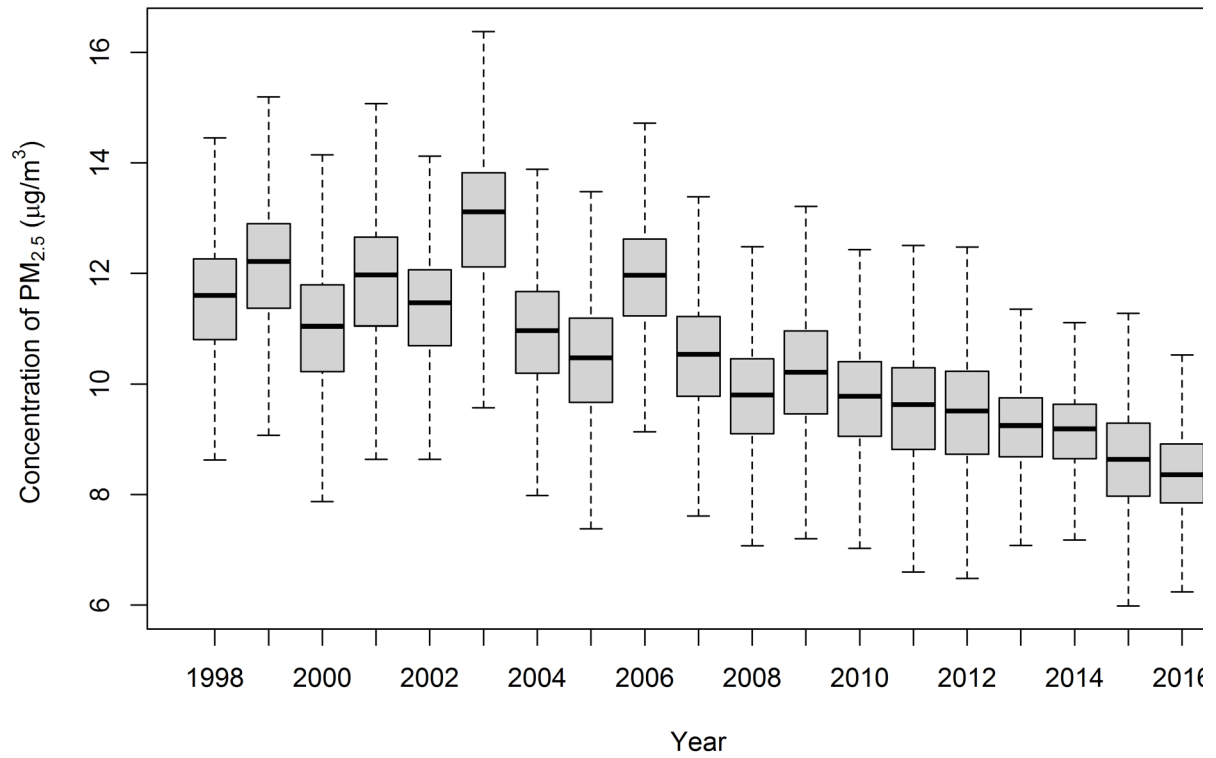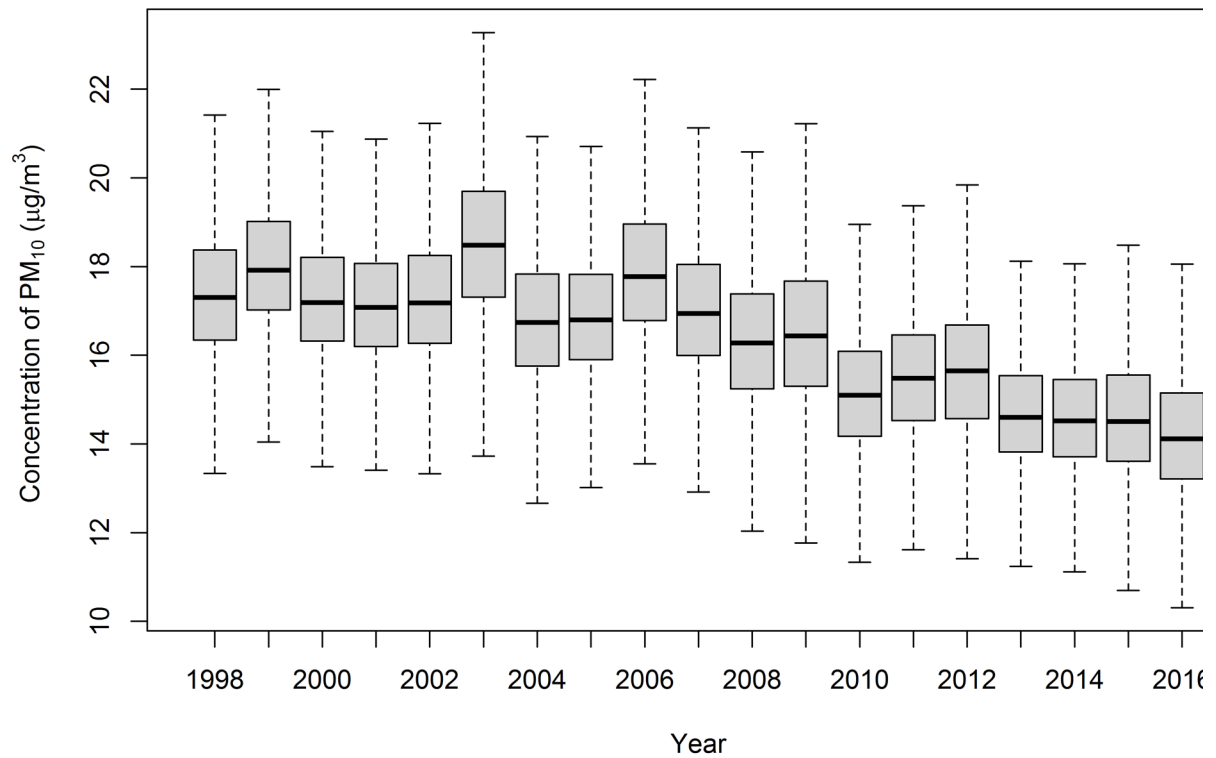

**Figure A3. Annual ambient air pollution exposure concentration (µg/m<sup>3</sup>) distribution over time in the nationwide cohort of 1,060,154 children born in Denmark, 1998–2016.** *Figure continues next 5 pages.*

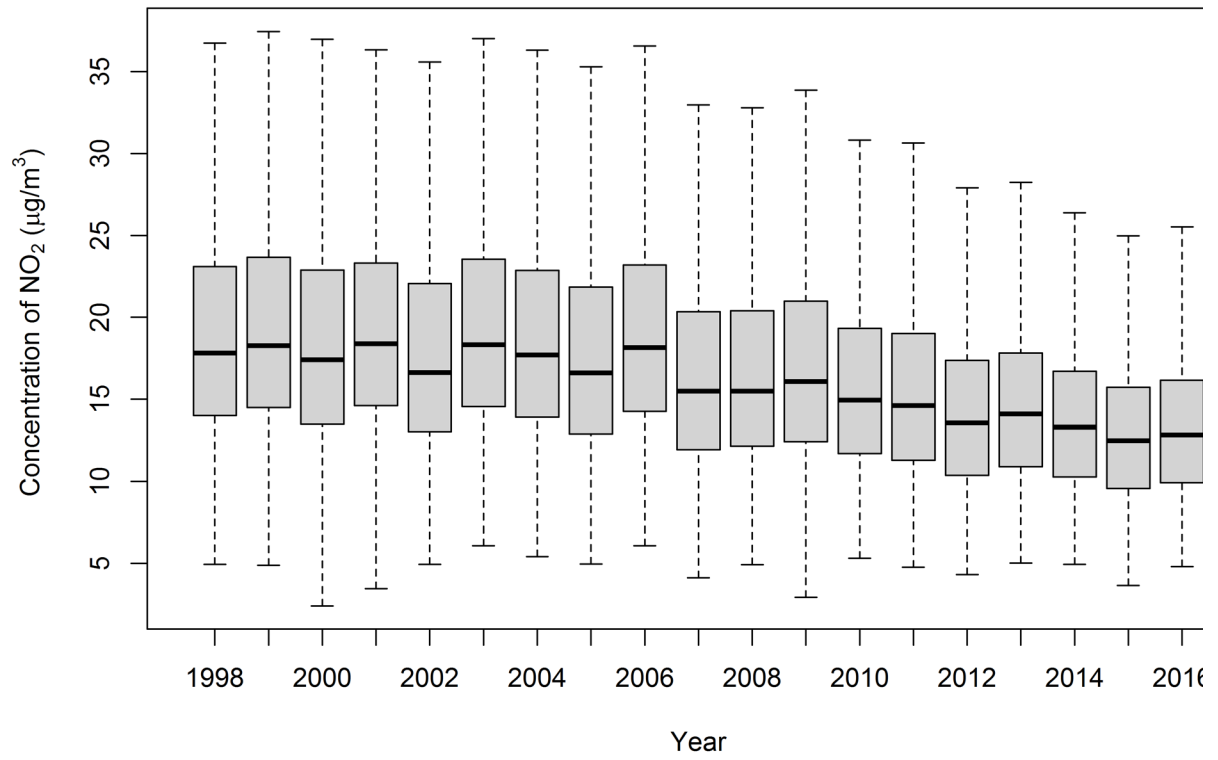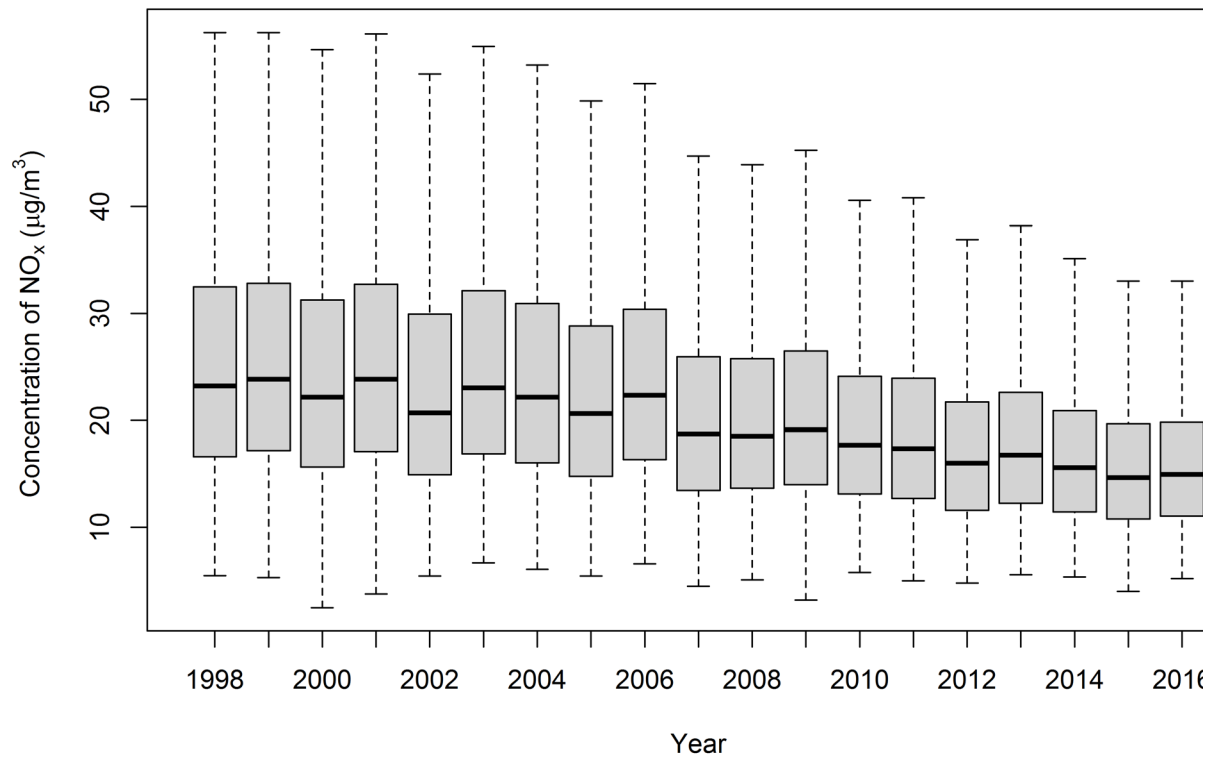

Figure A3. (Continued).

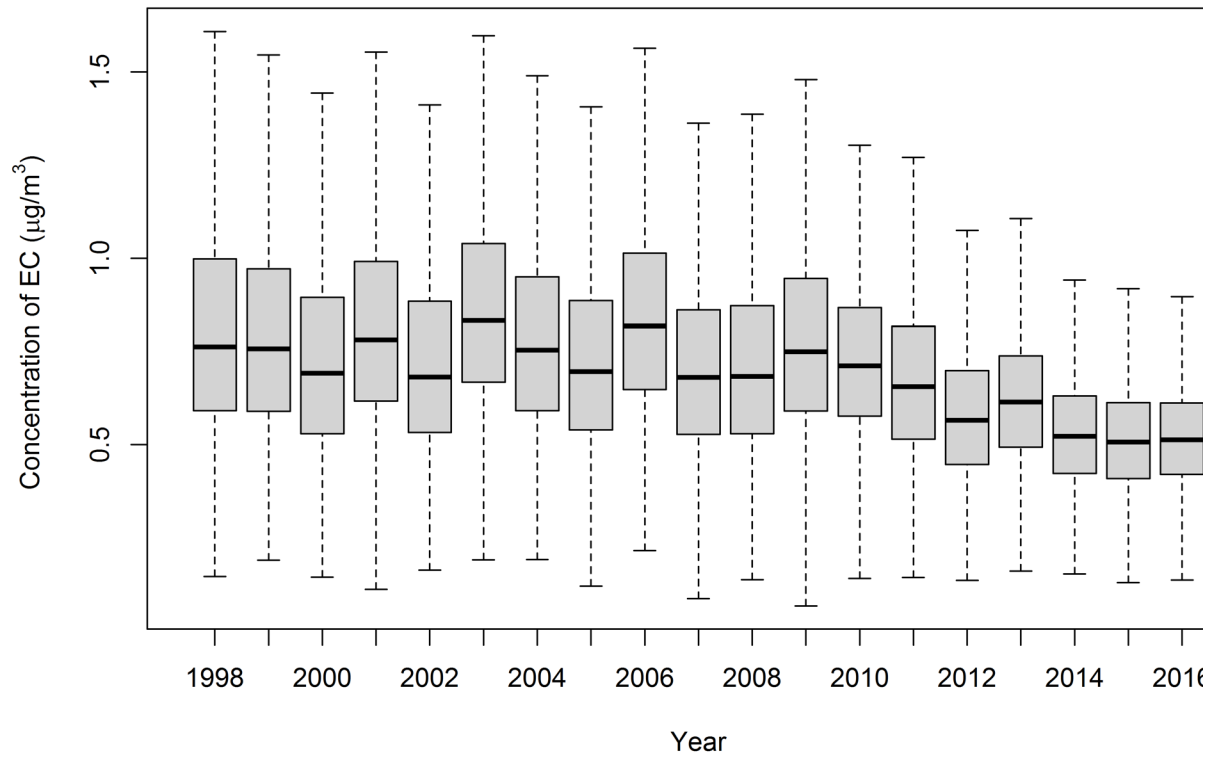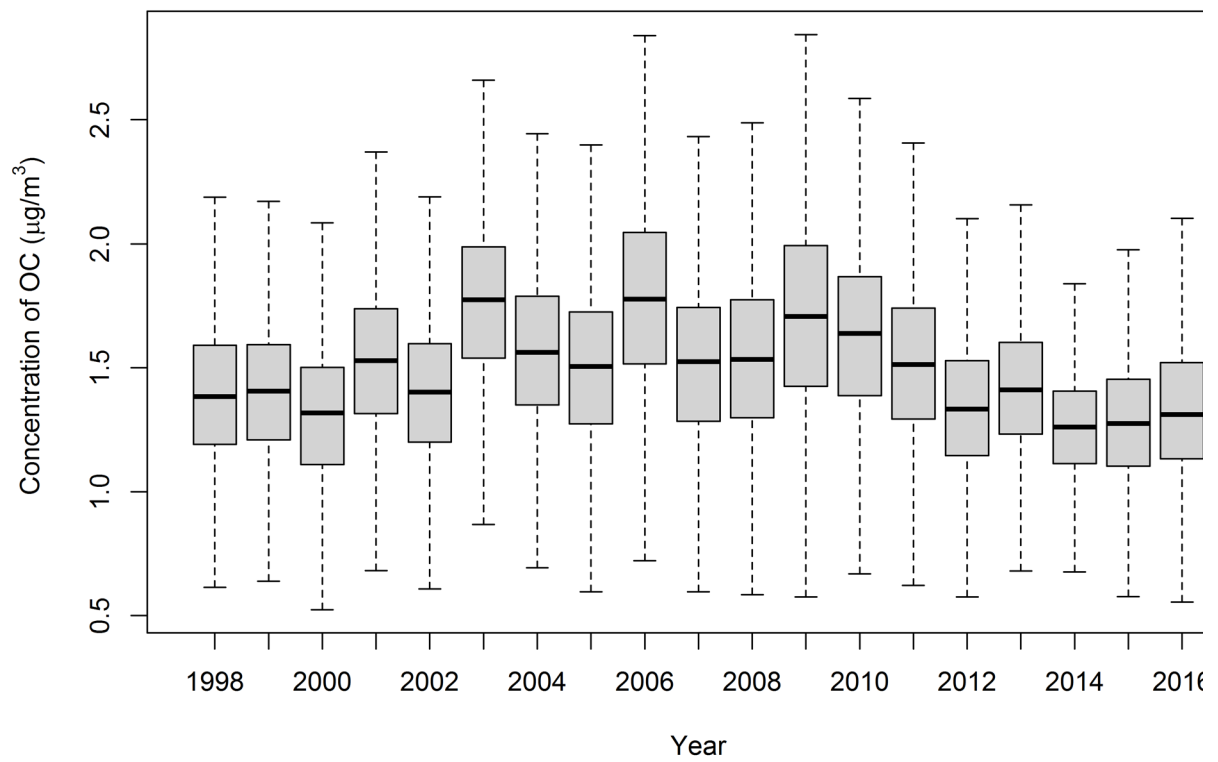

Figure A3. (Continued).

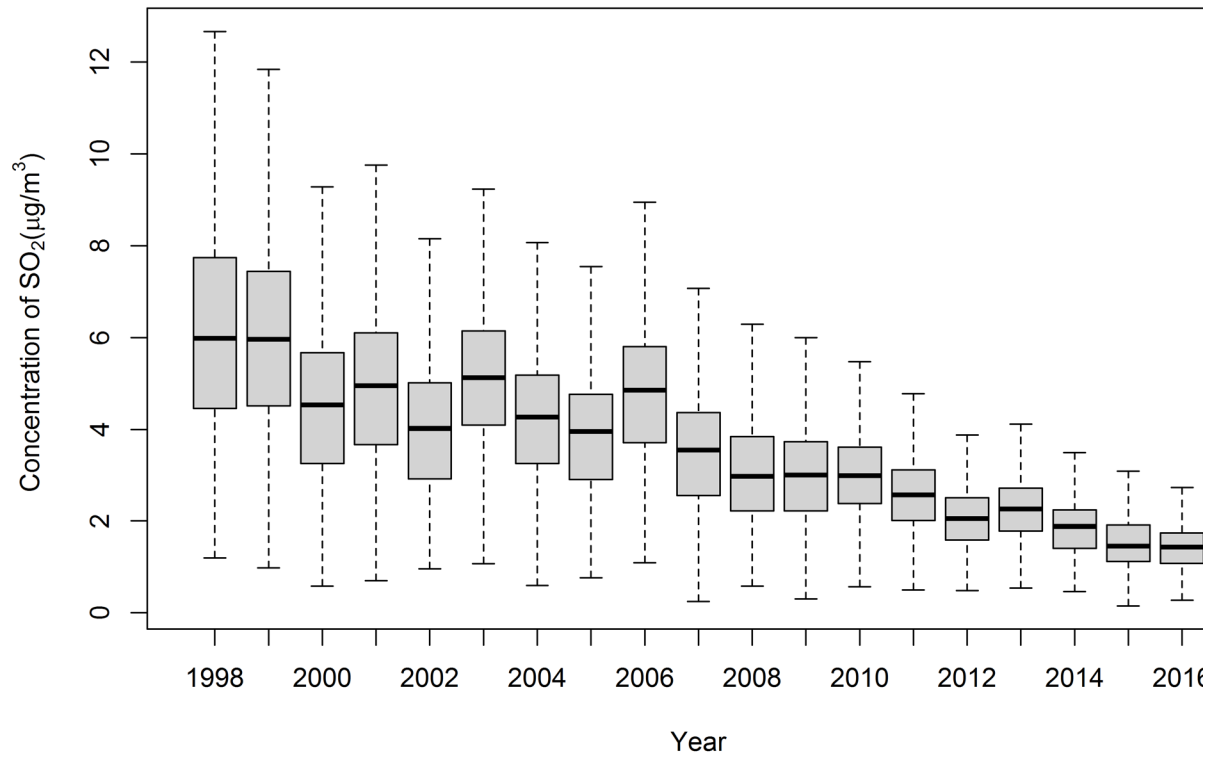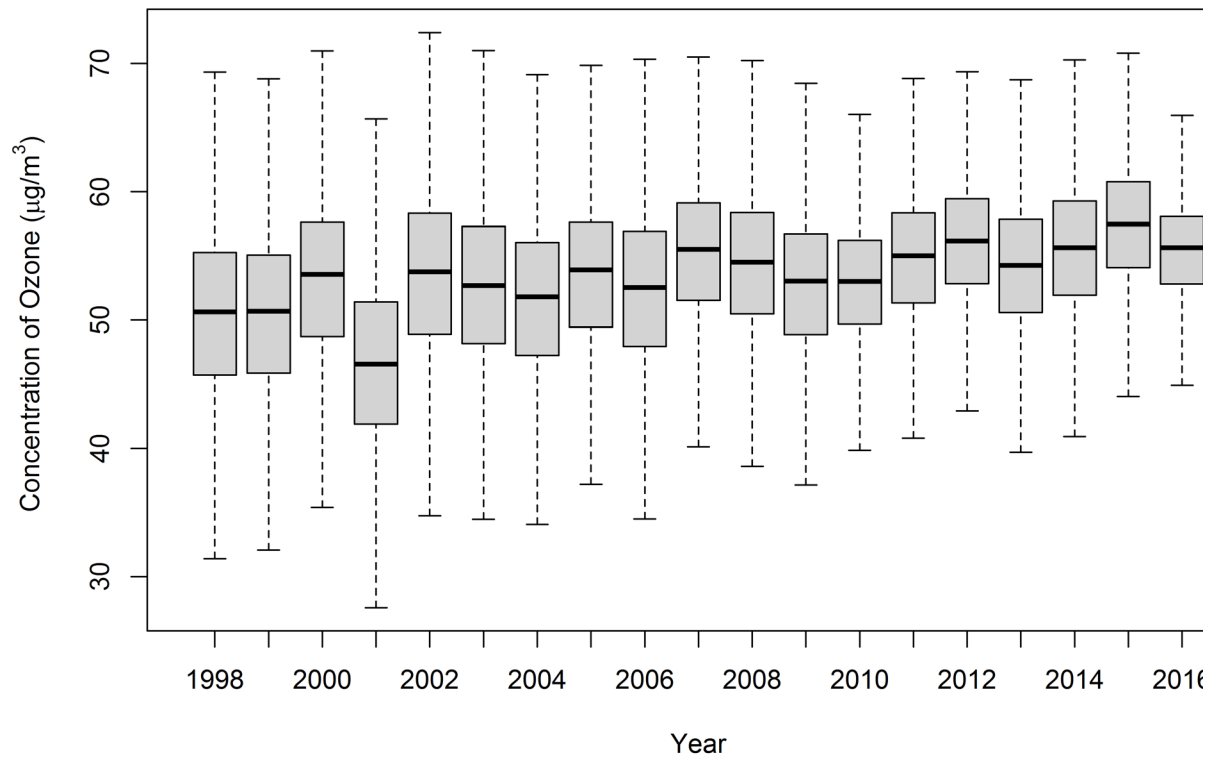

Figure A3. (Continued).



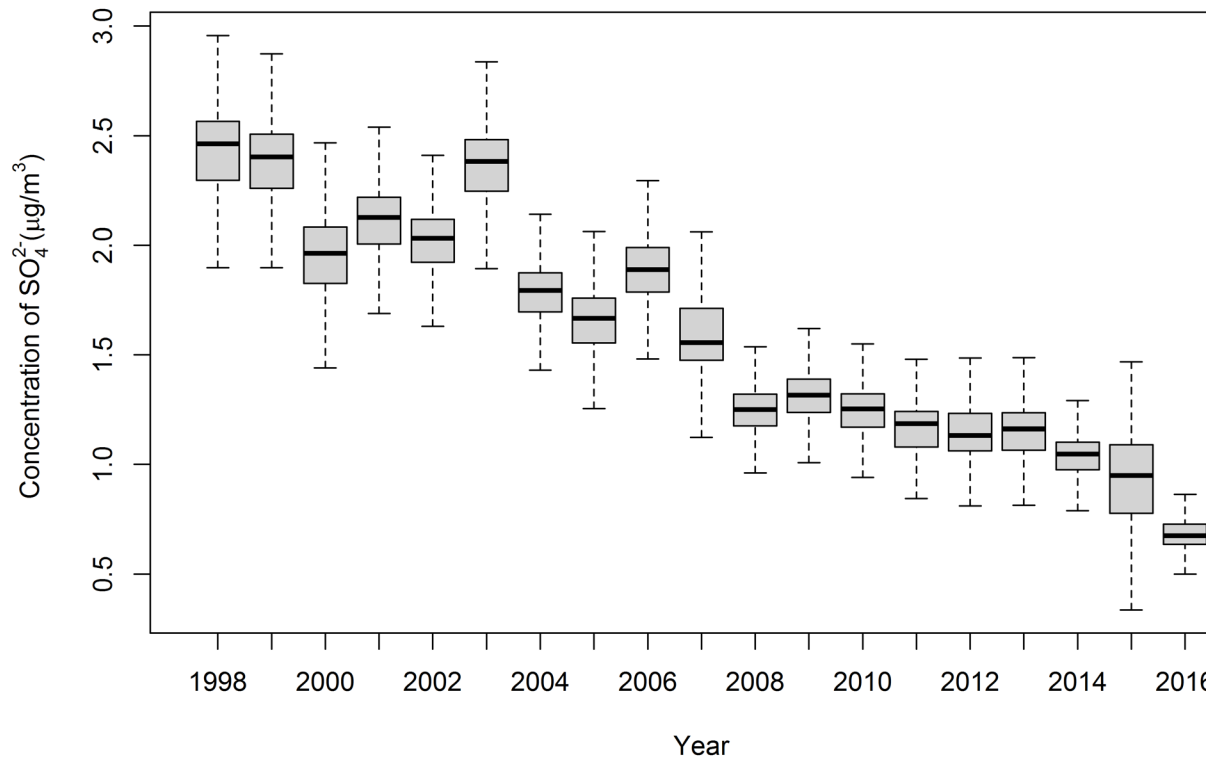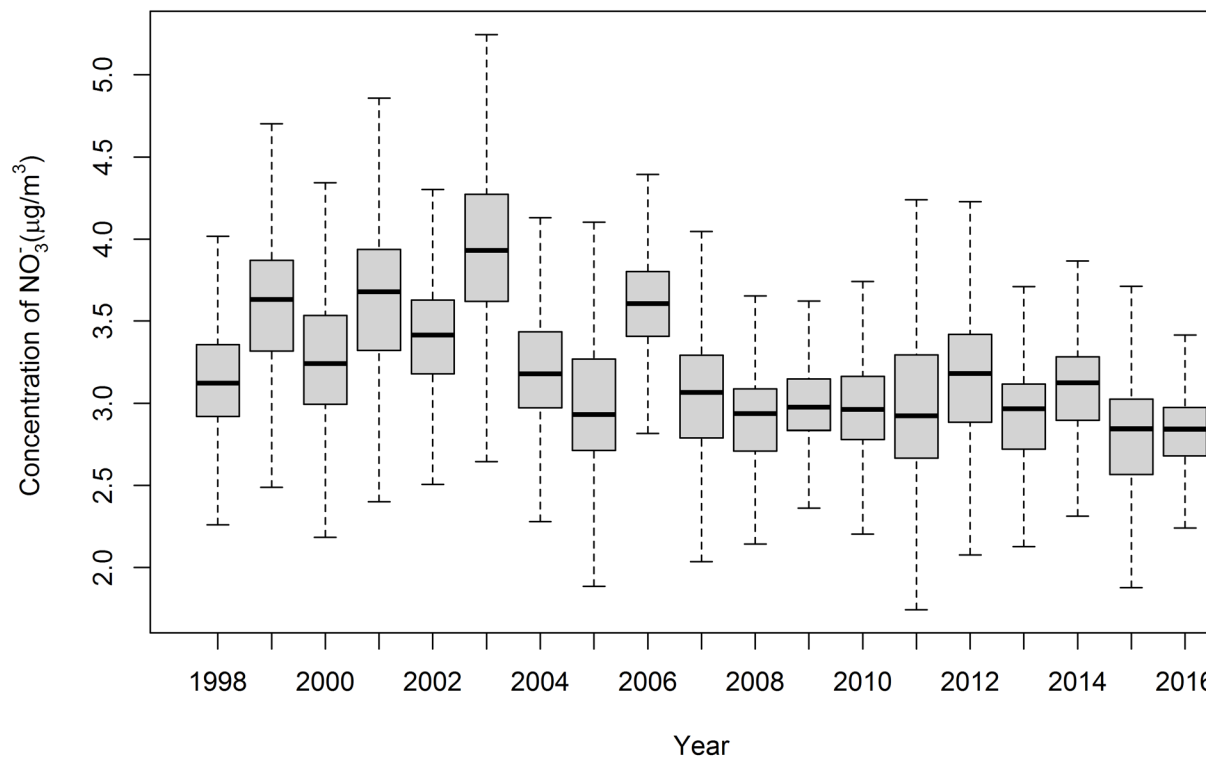

Figure A3. (Continued).

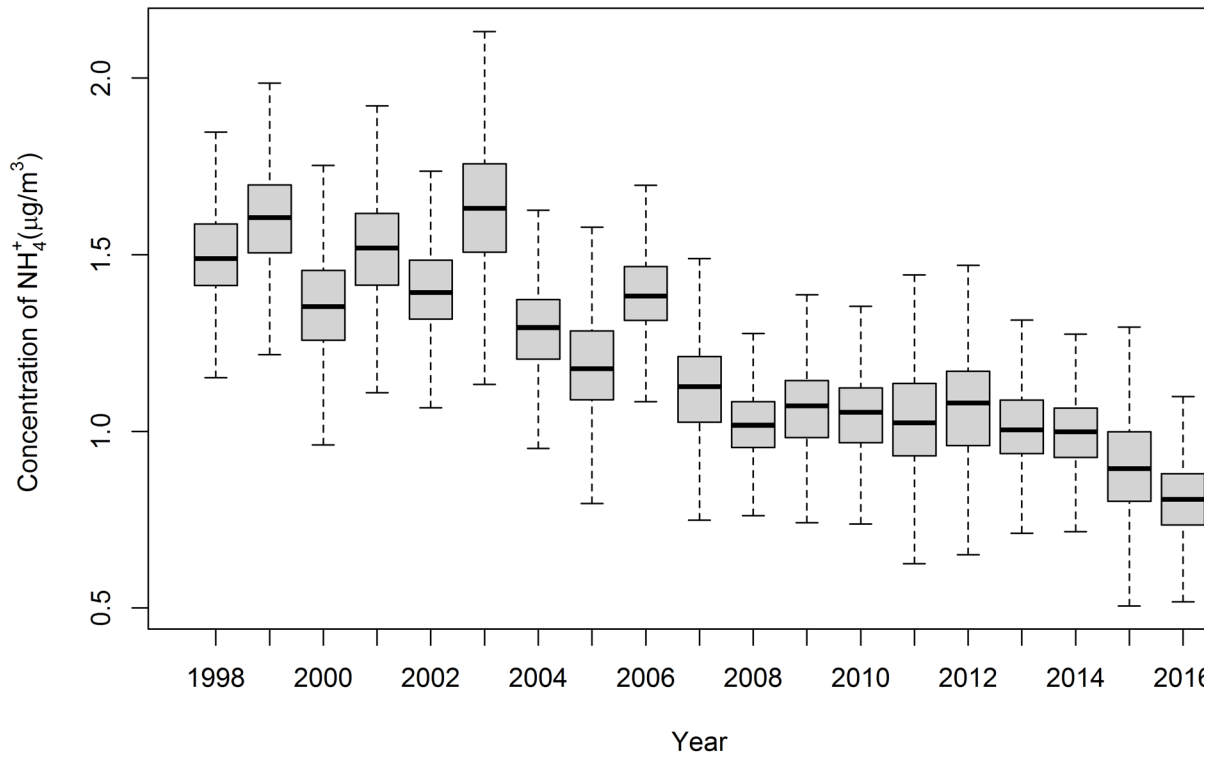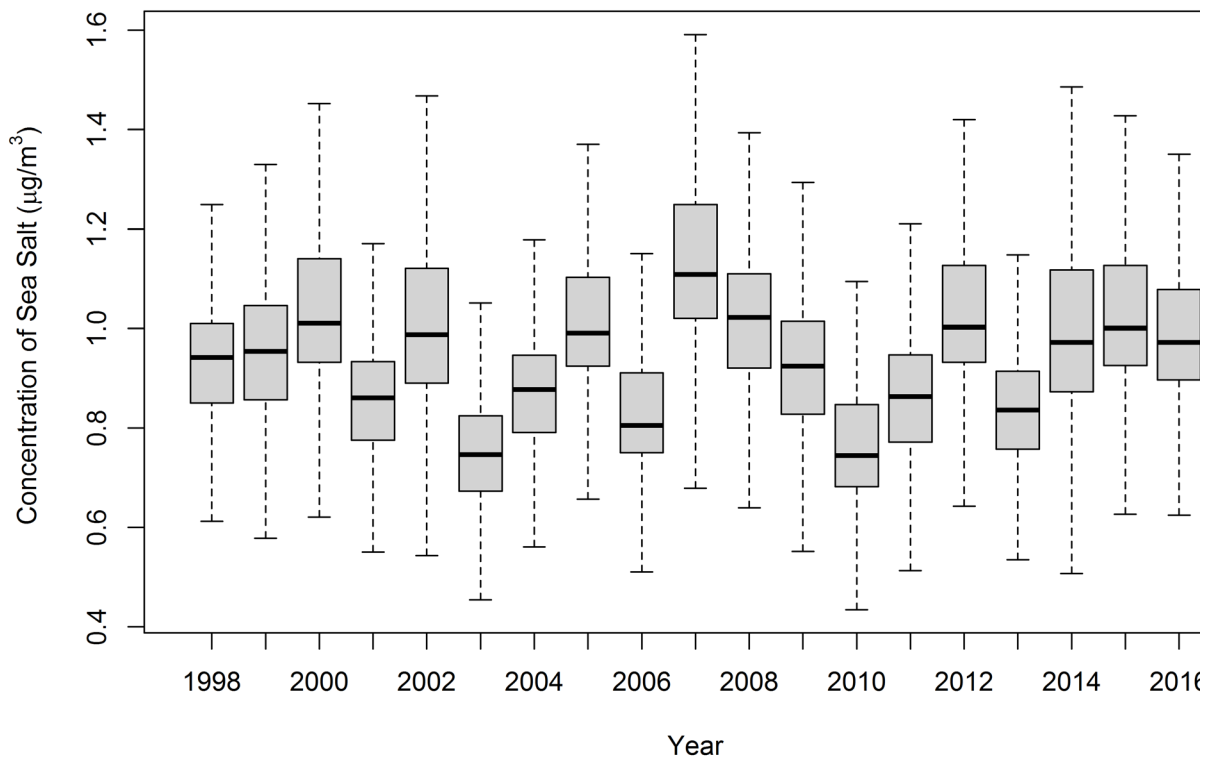

Figure A3. (Continued).

# DNBC study population flow-chart

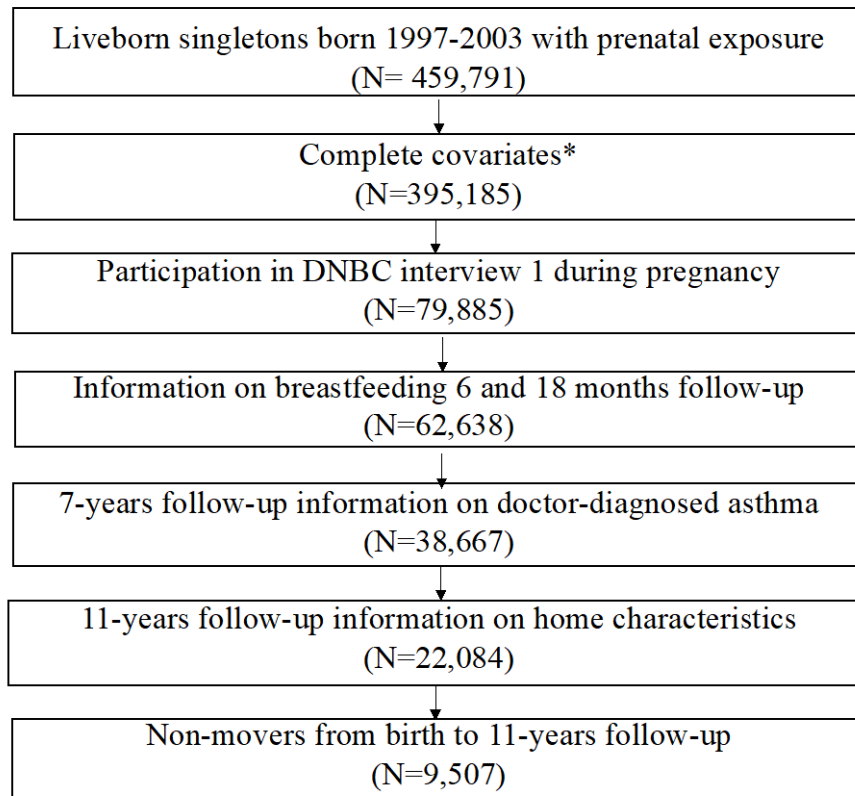

\* Maternal smoking, education, and income.

Figure A4. Study population flow-chart of the Danish National Birth Cohort (DNBC).

**Table A1. Correlation Coefficients between Modeled and Measured Pollutants in Ambient Air in Denmark <sup>a</sup>**

| Pollutant                     | Yearly <i>R</i> -Pearson ( <i>N</i> ) | Monthly <i>R</i> -Pearson ( <i>N</i> ) |
|-------------------------------|---------------------------------------|----------------------------------------|
| PM <sub>2.5</sub> (LVS)       | 0.92 (47)                             | 0.89 (514)                             |
| PM <sub>10</sub> (LVS)        | 0.88 (33)                             | 0.77 (361)                             |
| NO <sub>2</sub>               | 0.94 (294)                            | 0.91 (3,400)                           |
| NO <sub>x</sub>               | 0.96 (294)                            | 0.93 (3,404)                           |
| EC                            | 0.99 (27)                             | 0.89 (302)                             |
| OC                            |                                       | 0.62 (202)                             |
| O <sub>3</sub>                | 0.93 (185)                            | 0.93 (2,105)                           |
| SO <sub>4</sub> <sup>2-</sup> |                                       | 0.80 (760) <sup>b</sup>                |
| NO <sub>3</sub> <sup>-</sup>  |                                       | 0.67 (158) <sup>b</sup>                |
| NH <sub>4</sub> <sup>+</sup>  |                                       | 0.74 (482) <sup>b</sup>                |
| Sea salt                      |                                       | 0.88 (674) <sup>b</sup>                |

LVS stands for Low Volume Sampler and refers to the method used for these PM measurements in the Danish Air Quality Monitoring Programme. The LVS method is considered to be in accordance with the current EU-reference standard for PM measurements.

<sup>a</sup> For all available measurements from the Danish monitoring stations

<sup>b</sup> Measurements from EMEP stations within the DEHM domain covering Denmark and nearest surroundings for the period 2006–2015.

**Table A2. Study Population Characteristics of the Participants of the Birth Cohort Studies of Long-term Exposure to Ambient Air Pollution in Early Life and Development of Asthma in Children and Adolescents Born in Denmark, 1998–2016**

|                                         |                             | Nationwide cohort<br>( <i>N</i> = 1,060,154)<br><i>n</i> (%) | DNBC<br>( <i>N</i> = 22,084)<br><i>n</i> (%) | COPSAC<br>( <i>N</i> = 803)<br><i>n</i> (%) |
|-----------------------------------------|-----------------------------|--------------------------------------------------------------|----------------------------------------------|---------------------------------------------|
| Sex                                     | Boy                         | 544,044 (51.3)                                               | 11,028 (49.9)                                | 389 (48.4)                                  |
|                                         | Girl                        | 516,110 (48.7)                                               | 11,056 (50.1)                                | 414 (51.6)                                  |
| Season of birth                         | Winter (Jan, Feb, Dec)      | 264,511 (25.0)                                               | 5,434 (24.6)                                 | 223 (27.8)                                  |
|                                         | Spring (March, April, May)  | 285,516 (26.9)                                               | 6,389 (28.9)                                 | 200 (24.9)                                  |
|                                         | Summer (June, July, August) | 268,332 (25.3)                                               | 5,452 (24.7)                                 | 190 (23.7)                                  |
|                                         | Fall (Sept, Oct, Nov)       | 241,795 (22.8)                                               | 4,809 (21.8)                                 | 190 (23.7)                                  |
| Year of birth                           | 1998–2002                   | 281,150 (26.5)                                               | 21,564 (97.6)                                | 272 (33.9)                                  |
|                                         | 2003–2008                   | 352,394 (33.2)                                               | 520 (2.4)                                    | 0                                           |
|                                         | 2009–2016                   | 370,414 (34.9)                                               | 0                                            | 531 (66.1)                                  |
| Maternal education                      | Low                         | 216,145 (20.4)                                               | 1,878 (8.5)                                  | 61 (7.6)                                    |
|                                         | Middle                      | 439,372 (41.4)                                               | 10,619 (48.1)                                | 296 (36.9)                                  |
|                                         | High                        | 404,637 (38.2)                                               | 9,587 (43.4)                                 | 446 (55.5)                                  |
| Household income                        | Low                         | 333,308 (31.4)                                               | 2,991 (13.5)                                 | 108 (13.4)                                  |
|                                         | Middle                      | 407,931 (38.5)                                               | 9,211 (41.7)                                 | 271 (33.7)                                  |
|                                         | High                        | 318,915 (30.1)                                               | 9,882 (44.7)                                 | 424 (52.8)                                  |
| Older siblings                          | No                          | 482,150 (45.2)                                               | 10,059 (45.5)                                | 372 (46.3)                                  |
|                                         | Yes                         | 583,152 (54.8)                                               | 12,025 (54.5)                                | 431 (53.7)                                  |
| Maternal smoking during early pregnancy | No                          | 912,930 (86.1)                                               | 17,852 (80.8)                                | 711 (88.5)                                  |
|                                         | Yes                         | 147,224 (13.9)                                               | 4,232 (19.2)                                 | 92 (11.5)                                   |
| Maternal asthma                         | No                          | 915,292 (86.3)                                               | 20,283 (91.8)                                | 427 (53.2)                                  |
|                                         | Yes                         | 144,862 (13.7)                                               | 1,801 (8.2)                                  | 376 (46.8)                                  |
| Child asthma (ICD-10)                   | No                          | 995,011 (93.9)                                               | 20,609 (93.3)                                | 597 (74.3)                                  |
|                                         | Yes                         | 65,143 (6.1)                                                 | 1,475 (6.7)                                  | 206 (25.7)                                  |
| Pets in the home                        | No                          | NA                                                           | 12,932 (58.6)                                | 7 (0.9)                                     |
|                                         | Yes                         |                                                              | 9,152 (41.4)                                 | 796 (99.1)                                  |
| Breast feeding                          | No                          | NA                                                           | 5,706 (25.8)                                 | 6 (0.7)                                     |
|                                         | Yes                         |                                                              | 16,378 (74.2)                                | 797 (99.3)                                  |
| Daycare attendance                      | No                          | NA                                                           | 19,525 (88.4)                                | NA                                          |
|                                         | Yes                         |                                                              | 2,559 (11.6)                                 |                                             |
| Postnatal exposure to ETS               | No                          | NA                                                           | 18,306 (82.9)                                | 99 (12.3)                                   |
|                                         | Yes                         |                                                              | 3,778 (17.1)                                 | 704 (87.7)                                  |
| Mold or dampness in the home            | No                          | NA                                                           | 9,116 (41.3)                                 | NA                                          |
|                                         | Yes                         |                                                              | 12,968 (58.7)                                |                                             |
| Gas stove in the home                   | No                          | NA                                                           | 20,434 (92.5)                                | 424 (52.8)                                  |
|                                         | Yes                         |                                                              | 1,650 (7.5)                                  | 177 (22.0)                                  |
| Wood stove in the home                  | No                          | NA                                                           | 12,597 (57.0)                                | 394 (49.1)                                  |
|                                         | Yes                         |                                                              | 9,487 (43.0)                                 | 409 (50.9)                                  |

NA refers to not available. ETS refers to environmental tobacco smoke.

**Table A3. Prenatal Exposure to Ambient Air Pollution Concentrations ( $\mu\text{g}/\text{m}^3$ ) of the Children Born in Denmark, 1998–2016<sup>a</sup>**

| Pollutant                     | Nationwide Cohort<br>( <i>N</i> = 1,060,154) | DNBC<br>( <i>N</i> = 22,084) | COPSAC<br>( <i>N</i> = 803) |
|-------------------------------|----------------------------------------------|------------------------------|-----------------------------|
| PM <sub>2.5</sub>             | 10.5 ± 1.8                                   | 11.5 ± 1.4                   | 10.8 ± 1.5                  |
| PM <sub>10</sub>              | 16.6 ± 2.2                                   | 17.6 ± 1.8                   | 16.0 ± 2.1                  |
| NO <sub>2</sub>               | 17.5 ± 7.4                                   | 18.6 ± 7.3                   | 20.4 ± 6.9                  |
| NO <sub>x</sub>               | 24.1 ± 17.3                                  | 26.9 ± 19.4                  | 28.2 ± 16.9                 |
| EC                            | 0.7 ± 0.3                                    | 0.8 ± 0.4                    | 0.9 ± 0.3                   |
| OC                            | 1.5 ± 0.3                                    | 1.4 ± 0.3                    | 1.7 ± 0.3                   |
| SO <sub>2</sub>               | 3.8 ± 2.3                                    | 5.0 ± 2.3                    | 3.9 ± 1.5                   |
| O <sub>3</sub>                | 53.1 ± 6.7                                   | 51.1 ± 7.2                   | 49.9 ± 6.6                  |
| SO <sub>4</sub> <sup>2-</sup> | 1.6 ± 0.5                                    | 2.1 ± 0.2                    | 1.6 ± 0.4                   |
| NO <sub>3</sub> <sup>-</sup>  | 3.2 ± 0.5                                    | 3.4 ± 0.5                    | 3.2 ± 0.4                   |
| NH <sub>4</sub> <sup>+</sup>  | 1.2 ± 0.3                                    | 1.8 ± 0.9                    | 1.2 ± 0.3                   |
| SOA                           | 0.3 ± 0.1                                    | 0.3 ± 0.1                    | 0.3 ± 0.1                   |
| Sea salt                      | 0.9 ± 0.2                                    | 1.0 ± 0.2                    | 0.8 ± 0.1                   |

<sup>a</sup> Values are mean ± standard deviation.

**Table A4. Spearman Correlation Coefficients between Ambient Air Pollutant Concentrations During the Prenatal Periods for the Children Born in Denmark, 1998–2016**

| <b>Nationwide cohort (N = 1,060,154)</b> |                   |                  |                 |                 |       |       |                 |                |                               |                              |                              |       |      |
|------------------------------------------|-------------------|------------------|-----------------|-----------------|-------|-------|-----------------|----------------|-------------------------------|------------------------------|------------------------------|-------|------|
| Pollutant                                | PM <sub>2.5</sub> | PM <sub>10</sub> | NO <sub>2</sub> | NO <sub>x</sub> | OC    | EC    | SO <sub>2</sub> | O <sub>3</sub> | SO <sub>4</sub> <sup>2-</sup> | NO <sub>3</sub> <sup>-</sup> | NH <sub>4</sub> <sup>+</sup> | SOA   |      |
| PM <sub>10</sub>                         | 0.82              | 1.00             |                 |                 |       |       |                 |                |                               |                              |                              |       |      |
| NO <sub>2</sub>                          | 0.71              | 0.59             | 1.00            |                 |       |       |                 |                |                               |                              |                              |       |      |
| NO <sub>x</sub>                          | 0.69              | 0.60             | 0.98            | 1.00            |       |       |                 |                |                               |                              |                              |       |      |
| EC                                       | 0.74              | 0.68             | 0.91            | 0.90            | 1.00  |       |                 |                |                               |                              |                              |       |      |
| OC                                       | 0.58              | 0.49             | 0.63            | 0.58            | 0.77  | 1.00  |                 |                |                               |                              |                              |       |      |
| SO <sub>2</sub>                          | 0.79              | 0.67             | 0.66            | 0.63            | 0.69  | 0.52  | 1.00            |                |                               |                              |                              |       |      |
| O <sub>3</sub>                           | -0.59             | -0.54            | -0.81           | -0.79           | -0.82 | -0.64 | -0.59           | 1.00           |                               |                              |                              |       |      |
| SO <sub>4</sub> <sup>2-</sup>            | 0.83              | 0.63             | 0.41            | 0.40            | 0.42  | 0.23  | 0.77            | -0.32          | 1.00                          |                              |                              |       |      |
| NO <sub>3</sub> <sup>-</sup>             | 0.72              | 0.44             | 0.29            | 0.27            | 0.24  | 0.19  | 0.41            | -0.17          | 0.63                          | 1.00                         |                              |       |      |
| NH <sub>4</sub> <sup>+</sup>             | 0.83              | 0.64             | 0.31            | 0.30            | 0.34  | 0.24  | 0.66            | -0.27          | 0.91                          | 0.81                         | 1.00                         |       |      |
| SOA                                      | 0.17              | -0.05            | 0.22            | 0.19            | 0.07  | -0.07 | 0.09            | 0.14           | 0.18                          | 0.27                         | 0.04                         | 1.00  |      |
| Sea salt                                 | -0.34             | 0.07             | -0.44           | -0.39           | -0.40 | -0.42 | -0.27           | 0.28           | -0.23                         | -0.32                        | -0.17                        | -0.38 | 1.00 |
| <b>DNBC (N = 22,084)</b>                 |                   |                  |                 |                 |       |       |                 |                |                               |                              |                              |       |      |
| Pollutant                                | PM <sub>2.5</sub> | PM <sub>10</sub> | NO <sub>2</sub> | NO <sub>x</sub> | OC    | EC    | SO <sub>2</sub> | O <sub>3</sub> | SO <sub>4</sub> <sup>2-</sup> | NO <sub>3</sub> <sup>-</sup> | NH <sub>4</sub> <sup>+</sup> | SOA   |      |
| PM <sub>10</sub>                         | 0.78              | 1.00             |                 |                 |       |       |                 |                |                               |                              |                              |       |      |
| NO <sub>2</sub>                          | 0.84              | 0.74             | 1.00            |                 |       |       |                 |                |                               |                              |                              |       |      |
| NO <sub>x</sub>                          | 0.80              | 0.81             | 0.93            | 1.00            |       |       |                 |                |                               |                              |                              |       |      |
| OC                                       | 0.67              | 0.43             | 0.64            | 0.46            | 1.00  |       |                 |                |                               |                              |                              |       |      |
| EC                                       | 0.82              | 0.82             | 0.94            | 0.97            | 0.57  | 1.00  |                 |                |                               |                              |                              |       |      |
| SO <sub>2</sub>                          | 0.50              | 0.46             | 0.52            | 0.39            | 0.56  | 0.46  | 1.00            |                |                               |                              |                              |       |      |
| O <sub>3</sub>                           | -0.72             | -0.60            | -0.83           | -0.74           | -0.75 | -0.80 | -0.54           | 1.00           |                               |                              |                              |       |      |
| SO <sub>4</sub> <sup>2-</sup>            | 0.62              | 0.28             | 0.36            | 0.25            | 0.35  | 0.28  | 0.42            | -0.30          | 1.00                          |                              |                              |       |      |
| NO <sub>3</sub> <sup>-</sup>             | 0.62              | 0.24             | 0.21            | 0.12            | 0.27  | 0.11  | 0.14            | -0.16          | 0.55                          | 1.00                         |                              |       |      |
| NH <sub>4</sub> <sup>+</sup>             | 0.61              | 0.29             | 0.15            | 0.08            | 0.32  | 0.11  | 0.24            | -0.21          | 0.72                          | 0.87                         | 1.00                         |       |      |
| SOA                                      | 0.13              | -0.08            | 0.15            | 0.09            | -0.13 | 0.02  | -0.07           | 0.23           | 0.12                          | 0.24                         | -0.08                        | 1.00  |      |
| Sea salt                                 | -0.49             | 0.08             | -0.42           | -0.28           | -0.51 | -0.31 | -0.22           | 0.38           | -0.51                         | -0.45                        | 0.41                         | -0.39 | 1.00 |
| <b>COPSAC (N = 803)</b>                  |                   |                  |                 |                 |       |       |                 |                |                               |                              |                              |       |      |
| Pollutant                                | PM <sub>2.5</sub> | PM <sub>10</sub> | NO <sub>2</sub> | NO <sub>x</sub> | OC    | EC    | SO <sub>2</sub> | O <sub>3</sub> | SO <sub>4</sub> <sup>2-</sup> | NO <sub>3</sub> <sup>-</sup> | NH <sub>4</sub> <sup>+</sup> | SOA   |      |
| PM <sub>10</sub>                         | 0.94              | 1.00             |                 |                 |       |       |                 |                |                               |                              |                              |       |      |
| NO <sub>2</sub>                          | 0.62              | 0.71             | 1.00            |                 |       |       |                 |                |                               |                              |                              |       |      |
| NO <sub>x</sub>                          | 0.63              | 0.72             | 0.98            | 1.00            |       |       |                 |                |                               |                              |                              |       |      |
| EC                                       | 0.67              | 0.78             | 0.92            | 0.91            | 1.00  |       |                 |                |                               |                              |                              |       |      |
| OC                                       | 0.38              | 0.47             | 0.29            | 0.25            | 0.57  | 1.00  |                 |                |                               |                              |                              |       |      |
| SO <sub>2</sub>                          | 0.77              | 0.71             | 0.55            | 0.53            | 0.51  | 0.22  | 1.00            |                |                               |                              |                              |       |      |
| O <sub>3</sub>                           | -0.63             | -0.70            | -0.80           | -0.77           | -0.85 | -0.48 | -0.57           | 1.00           |                               |                              |                              |       |      |
| SO <sub>4</sub> <sup>2-</sup>            | 0.85              | 0.69             | 0.32            | 0.32            | 0.31  | 0.14  | 0.77            | -0.34          | 1.00                          |                              |                              |       |      |
| NO <sub>3</sub> <sup>-</sup>             | 0.64              | 0.44             | 0.03            | 0.06            | 0.01  | -0.07 | 0.50            | -0.07          | 0.79                          | 1.00                         |                              |       |      |
| NH <sub>4</sub> <sup>+</sup>             | 0.80              | 0.63             | 0.15            | 0.17            | 0.18  | 0.12  | 0.68            | -0.28          | 0.91                          | 0.89                         | 1.00                         |       |      |
| SOA                                      | -0.24             | -0.25            | 0.09            | 0.09            | -0.11 | -0.52 | -0.16           | 0.31           | -0.20                         | -0.15                        | -0.38                        | 1.00  |      |
| Sea salt                                 | 0.39              | 0.44             | 0.01            | 0.02            | 0.01  | -0.02 | 0.33            | -0.10          | 0.49                          | 0.29                         | 0.47                         | -0.21 | 1.00 |

**Table A5. Spearman Correlation Coefficients between Prenatal and Postnatal Exposure Concentrations for the Children Born in Denmark, 1998–2016**

| <b>Nationwide cohort (N = 1,060,154)</b> |                                                                                   |                  |                 |                 |       |       |                 |                |                               |                              |                              |       |          |
|------------------------------------------|-----------------------------------------------------------------------------------|------------------|-----------------|-----------------|-------|-------|-----------------|----------------|-------------------------------|------------------------------|------------------------------|-------|----------|
| Prenatal exposure                        | Postnatal exposure as annual mean concentration during the first year of life     |                  |                 |                 |       |       |                 |                |                               |                              |                              |       |          |
|                                          | PM <sub>2.5</sub>                                                                 | PM <sub>10</sub> | NO <sub>2</sub> | NO <sub>x</sub> | EC    | OC    | SO <sub>2</sub> | O <sub>3</sub> | SO <sub>4</sub> <sup>2-</sup> | NO <sub>3</sub> <sup>-</sup> | NH <sub>4</sub> <sup>+</sup> | SOA   | Sea salt |
| PM <sub>2.5</sub>                        | 0.76                                                                              | 0.62             | 0.63            | 0.61            | 0.59  | 0.34  | 0.68            | -0.50          | 0.74                          | 0.46                         | 0.65                         | 0.15  | -0.22    |
| PM <sub>10</sub>                         | 0.63                                                                              | 0.73             | 0.50            | 0.51            | 0.51  | 0.24  | 0.61            | -0.40          | 0.59                          | 0.30                         | 0.52                         | 0.08  | 0.03     |
| NO <sub>2</sub>                          | 0.64                                                                              | 0.51             | 0.91            | 0.89            | 0.81  | 0.54  | 0.62            | -0.69          | 0.41                          | 0.25                         | 0.28                         | 0.24  | -0.37    |
| NO <sub>x</sub>                          | 0.62                                                                              | 0.52             | 0.90            | 0.90            | 0.80  | 0.50  | 0.60            | -0.68          | 0.39                          | 0.24                         | 0.27                         | 0.22  | -0.34    |
| EC                                       | 0.63                                                                              | 0.56             | 0.83            | 0.81            | 0.83  | 0.57  | 0.60            | -0.64          | 0.42                          | 0.28                         | 0.24                         | 0.23  | -0.29    |
| OC                                       | 0.45                                                                              | 0.35             | 0.61            | 0.56            | 0.61  | 0.62  | 0.45            | -0.45          | 0.24                          | 0.12                         | 0.13                         | 0.27  | -0.28    |
| SO <sub>2</sub>                          | 0.70                                                                              | 0.59             | 0.61            | 0.58            | 0.59  | 0.38  | 0.90            | -0.48          | 0.74                          | 0.35                         | 0.60                         | 0.15  | -0.16    |
| O <sub>3</sub>                           | -0.46                                                                             | -0.39            | -0.76           | -0.73           | -0.67 | -0.5  | -0.54           | 0.62           | -0.23                         | -0.13                        | -0.2                         | -0.22 | 0.26     |
| SO <sub>4</sub> <sup>2-</sup>            | 0.70                                                                              | 0.55             | 0.39            | 0.38            | 0.37  | 0.14  | 0.71            | -0.32          | 0.89                          | 0.49                         | 0.79                         | 0.11  | -0.11    |
| NO <sub>3</sub> <sup>-</sup>             | 0.49                                                                              | 0.31             | 0.26            | 0.25            | 0.20  | 0.08  | 0.39            | -0.20          | 0.51                          | 0.53                         | 0.57                         | 0.03  | -0.16    |
| NH <sub>4</sub> <sup>+</sup>             | 0.62                                                                              | 0.49             | 0.27            | 0.27            | 0.26  | 0.08  | 0.59            | -0.24          | 0.80                          | 0.52                         | 0.78                         | 0.04  | -0.07    |
| SOA                                      | 0.28                                                                              | 0.13             | 0.34            | 0.32            | 0.28  | 0.23  | 0.26            | -0.28          | 0.25                          | 0.16                         | 0.16                         | 0.09  | -0.17    |
| Sea salt                                 | -0.23                                                                             | 0.00             | -0.39           | -0.36           | -0.33 | -0.30 | -0.18           | 0.28           | -0.14                         | -0.13                        | -0.05                        | -0.16 | 0.32     |
| <b>DNBC (N = 22,084)</b>                 |                                                                                   |                  |                 |                 |       |       |                 |                |                               |                              |                              |       |          |
| Prenatal exposure                        | Postnatal exposure as annual mean concentration during the first year of life     |                  |                 |                 |       |       |                 |                |                               |                              |                              |       |          |
|                                          | PM <sub>2.5</sub>                                                                 | PM <sub>10</sub> | NO <sub>2</sub> | NO <sub>x</sub> | EC    | OC    | SO <sub>2</sub> | O <sub>3</sub> | SO <sub>4</sub> <sup>2-</sup> | NO <sub>3</sub> <sup>-</sup> | NH <sub>4</sub> <sup>+</sup> | SOA   | Sea salt |
| PM <sub>2.5</sub>                        | 0.61                                                                              | 0.53             | 0.65            | 0.61            | 0.46  | 0.61  | 0.25            | -0.43          | 0.18                          | 0.25                         | -0.38                        | 0.25  | -0.24    |
| PM <sub>10</sub>                         | 0.61                                                                              | 0.76             | 0.62            | 0.67            | 0.32  | 0.67  | 0.32            | -0.44          | 0.19                          | 0.14                         | -0.17                        | 0.12  | 0.00     |
| NO <sub>2</sub>                          | 0.74                                                                              | 0.65             | 0.91            | 0.84            | 0.57  | 0.84  | 0.46            | -0.71          | 0.30                          | 0.14                         | -0.54                        | 0.19  | -0.37    |
| NO <sub>x</sub>                          | 0.70                                                                              | 0.71             | 0.85            | 0.90            | 0.41  | 0.87  | 0.34            | -0.64          | 0.21                          | 0.08                         | -0.40                        | 0.13  | -0.26    |
| EC                                       | 0.40                                                                              | 0.24             | 0.50            | 0.35            | 0.62  | 0.39  | 0.27            | -0.35          | 0.02                          | 0.12                         | -0.43                        | 0.32  | -0.34    |
| OC                                       | 0.69                                                                              | 0.69             | 0.85            | 0.85            | 0.47  | 0.87  | 0.37            | -0.63          | 0.17                          | 0.07                         | -0.43                        | 0.17  | -0.27    |
| SO <sub>2</sub>                          | 0.37                                                                              | 0.36             | 0.47            | 0.35            | 0.44  | 0.39  | 0.79            | -0.37          | 0.21                          | 0.03                         | -0.42                        | 0.09  | -0.16    |
| O <sub>3</sub>                           | -0.55                                                                             | -0.52            | -0.79           | -0.71           | -0.49 | -0.71 | -0.40           | 0.60           | -0.07                         | -0.03                        | 0.43                         | -0.14 | 0.24     |
| SO <sub>4</sub> <sup>2-</sup>            | 0.24                                                                              | 0.13             | 0.24            | 0.17            | 0.25  | 0.17  | 0.09            | -0.11          | 0.20                          | 0.12                         | -0.35                        | 0.10  | -0.12    |
| NO <sub>3</sub> <sup>-</sup>             | 0.25                                                                              | 0.11             | 0.11            | 0.06            | 0.13  | 0.04  | -0.03           | 0.03           | 0.11                          | 0.42                         | -0.12                        | 0.27  | -0.10    |
| NH <sub>4</sub> <sup>+</sup>             | 0.13                                                                              | 0.07             | 0.01            | -0.01           | 0.05  | 0.03  | -0.07           | 0.10           | 0.02                          | 0.26                         | 0.05                         | 0.17  | 0.16     |
| SOA                                      | 0.23                                                                              | 0.07             | 0.22            | 0.16            | 0.28  | 0.18  | 0.09            | -0.18          | 0.20                          | 0.11                         | -0.30                        | 0.01  | -0.21    |
| Sea salt                                 | -0.17                                                                             | 0.06             | -0.31           | -0.21           | -0.32 | -0.20 | 0.00            | 0.12           | 0.10                          | -0.05                        | 0.44                         | -0.34 | 0.31     |
| <b>DNBC (N = 22,084)</b>                 |                                                                                   |                  |                 |                 |       |       |                 |                |                               |                              |                              |       |          |
| Prenatal exposure                        | Postnatal exposure as the mean concentration during the first seven years of life |                  |                 |                 |       |       |                 |                |                               |                              |                              |       |          |
|                                          | PM <sub>2.5</sub>                                                                 | PM <sub>10</sub> | NO <sub>2</sub> | NO <sub>x</sub> | EC    | OC    | SO <sub>2</sub> | O <sub>3</sub> | SO <sub>4</sub> <sup>2-</sup> | NO <sub>3</sub> <sup>-</sup> | NH <sub>4</sub> <sup>+</sup> | SOA   | Sea salt |
| PM <sub>2.5</sub>                        | 0.74                                                                              | 0.57             | 0.68            | 0.58            | 0.57  | 0.60  | 0.45            | -0.57          | 0.44                          | 0.46                         | -0.42                        | 0.09  | -0.31    |
| PM <sub>10</sub>                         | 0.50                                                                              | 0.70             | 0.49            | 0.50            | 0.29  | 0.52  | 0.35            | -0.39          | 0.15                          | 0.18                         | -0.07                        | -0.02 | 0.11     |
| NO <sub>2</sub>                          | 0.68                                                                              | 0.53             | 0.82            | 0.70            | 0.60  | 0.72  | 0.47            | -0.67          | 0.35                          | 0.20                         | -0.54                        | 0.16  | -0.41    |
| NO <sub>x</sub>                          | 0.65                                                                              | 0.58             | 0.77            | 0.75            | 0.45  | 0.74  | 0.37            | -0.60          | 0.27                          | 0.13                         | -0.43                        | 0.12  | -0.30    |
| EC                                       | 0.53                                                                              | 0.29             | 0.58            | 0.40            | 0.76  | 0.46  | 0.42            | -0.52          | 0.21                          | 0.24                         | -0.48                        | 0.20  | -0.46    |
| OC                                       | 0.66                                                                              | 0.58             | 0.78            | 0.71            | 0.57  | 0.76  | 0.44            | -0.63          | 0.26                          | 0.14                         | -0.47                        | 0.15  | -0.35    |
| SO <sub>2</sub>                          | 0.39                                                                              | 0.35             | 0.46            | 0.33            | 0.45  | 0.38  | 0.76            | -0.40          | 0.25                          | 0.11                         | -0.41                        | 0.05  | -0.20    |
| O <sub>3</sub>                           | -0.64                                                                             | -0.49            | -0.79           | -0.65           | -0.63 | -0.68 | -0.50           | 0.66           | -0.33                         | -0.16                        | 0.48                         | -0.15 | 0.39     |
| SO <sub>4</sub> <sup>2-</sup>            | 0.41                                                                              | 0.29             | 0.33            | 0.22            | 0.21  | 0.24  | 0.38            | -0.28          | 0.58                          | 0.34                         | -0.36                        | -0.12 | -0.11    |
| NO <sub>3</sub> <sup>-</sup>             | 0.43                                                                              | 0.23             | 0.17            | 0.10            | 0.16  | 0.09  | 0.15            | -0.13          | 0.41                          | 0.66                         | -0.09                        | 0.04  | -0.11    |
| NH <sub>4</sub> <sup>+</sup>             | 0.31                                                                              | 0.23             | 0.06            | 0.02            | 0.05  | 0.02  | 0.02            | -0.07          | 0.39                          | 0.51                         | 0.12                         | 0.59  | -0.11    |
| SOA                                      | 0.47                                                                              | 0.08             | 0.55            | 0.38            | 0.57  | 0.40  | 0.26            | -0.47          | 0.28                          | 0.31                         | -0.68                        | 0.19  | -0.63    |
| Sea salt                                 | -0.46                                                                             | -0.02            | -0.51           | -0.34           | -0.56 | -0.36 | -0.30           | 0.42           | -0.38                         | -0.28                        | 0.63                         | -0.23 | 0.66     |

*Continues next page*



**Table A5 (continued).** Spearman Correlation Coefficients between Prenatal and Postnatal Exposure Concentrations for the Children Born in Denmark, 1998–2016

| <b>COPSAC<br/>(N = 803)</b>   |                   | <b>Postnatal exposure as the mean concentration during the first six years of life</b>                      |                 |                 |       |       |                 |                |                               |                              |                              |       |          |  |
|-------------------------------|-------------------|-------------------------------------------------------------------------------------------------------------|-----------------|-----------------|-------|-------|-----------------|----------------|-------------------------------|------------------------------|------------------------------|-------|----------|--|
| Prenatal exposure             | PM <sub>2.5</sub> | PM <sub>10</sub>                                                                                            | NO <sub>2</sub> | NO <sub>x</sub> | EC    | OC    | SO <sub>2</sub> | O <sub>3</sub> | SO <sub>4</sub> <sup>2-</sup> | NO <sub>3</sub> <sup>-</sup> | NH <sub>4</sub> <sup>+</sup> | SOA   | Sea salt |  |
| PM <sub>2.5</sub>             | 0.79              | 0.75                                                                                                        | 0.61            | 0.61            | 0.68  | 0.63  | 0.71            | -0.58          | 0.72                          | 0.40                         | 0.60                         | 0.71  | -0.50    |  |
| PM <sub>10</sub>              | 0.75              | 0.75                                                                                                        | 0.64            | 0.65            | 0.70  | 0.61  | 0.64            | -0.61          | 0.64                          | 0.27                         | 0.46                         | 0.6   | -0.47    |  |
| NO <sub>2</sub>               | 0.63              | 0.65                                                                                                        | 0.85            | 0.85            | 0.83  | 0.59  | 0.5             | -0.83          | 0.31                          | -0.10                        | 0.06                         | 0.59  | -0.40    |  |
| NO <sub>x</sub>               | 0.64              | 0.67                                                                                                        | 0.84            | 0.85            | 0.81  | 0.57  | 0.49            | -0.8           | 0.31                          | -0.06                        | 0.09                         | 0.57  | -0.37    |  |
| EC                            | 0.54              | 0.57                                                                                                        | 0.74            | 0.74            | 0.75  | 0.55  | 0.39            | -0.71          | 0.23                          | -0.17                        | -0.01                        | 0.52  | -0.34    |  |
| OC                            | 0.05              | 0.07                                                                                                        | 0.16            | 0.15            | 0.20  | 0.24  | 0.00            | -0.14          | -0.07                         | -0.33                        | -0.22                        | 0.15  | -0.10    |  |
| SO <sub>2</sub>               | 0.71              | 0.68                                                                                                        | 0.61            | 0.58            | 0.63  | 0.61  | 0.88            | -0.59          | 0.71                          | 0.33                         | 0.52                         | 0.69  | -0.45    |  |
| O <sub>3</sub>                | -0.52             | -0.53                                                                                                       | -0.66           | -0.65           | -0.66 | -0.49 | -0.44           | 0.62           | -0.33                         | 0.04                         | -0.11                        | -0.54 | 0.31     |  |
| SO <sub>4</sub> <sup>2-</sup> | 0.69              | 0.6                                                                                                         | 0.42            | 0.39            | 0.47  | 0.51  | 0.74            | -0.4           | 0.85                          | 0.57                         | 0.75                         | 0.66  | -0.52    |  |
| NO <sub>3</sub> <sup>-</sup>  | 0.49              | 0.43                                                                                                        | 0.14            | 0.13            | 0.19  | 0.25  | 0.51            | -0.13          | 0.64                          | 0.77                         | 0.80                         | 0.40  | -0.20    |  |
| NH <sub>4</sub> <sup>+</sup>  | 0.62              | 0.53                                                                                                        | 0.27            | 0.25            | 0.33  | 0.41  | 0.65            | -0.24          | 0.79                          | 0.71                         | 0.84                         | 0.58  | -0.4     |  |
| SOA                           | 0.04              | 0.07                                                                                                        | 0.13            | 0.13            | 0.12  | 0.11  | 0.02            | -0.18          | -0.1                          | -0.14                        | -0.13                        | -0.07 | -0.02    |  |
| Sea salt                      | 0.41              | 0.33                                                                                                        | 0.11            | 0.10            | 0.17  | 0.24  | 0.46            | -0.11          | 0.73                          | 0.43                         | 0.58                         | 0.18  | -0.51    |  |
| <b>COPSAC<br/>(N = 803)</b>   |                   | <b>Postnatal exposure as the annual mean concentration during the year before lung function measurement</b> |                 |                 |       |       |                 |                |                               |                              |                              |       |          |  |
| Prenatal exposure             | PM <sub>2.5</sub> | PM <sub>10</sub>                                                                                            | NO <sub>2</sub> | NO <sub>x</sub> | EC    | OC    | SO <sub>2</sub> | O <sub>3</sub> | SO <sub>4</sub> <sup>2-</sup> | NO <sub>3</sub> <sup>-</sup> | NH <sub>4</sub> <sup>+</sup> | SOA   | Sea salt |  |
| PM <sub>2.5</sub>             | 0.74              | 0.69                                                                                                        | 0.49            | 0.51            | 0.41  | 0.01  | 0.66            | -0.42          | 0.71                          | 0.51                         | 0.64                         | 0.00  | 0.50     |  |
| PM <sub>10</sub>              | 0.67              | 0.65                                                                                                        | 0.52            | 0.54            | 0.42  | -0.03 | 0.64            | -0.42          | 0.60                          | 0.45                         | 0.54                         | 0.11  | 0.41     |  |
| NO <sub>2</sub>               | 0.55              | 0.55                                                                                                        | 0.69            | 0.68            | 0.58  | 0.09  | 0.58            | -0.52          | 0.42                          | 0.17                         | 0.29                         | 0.13  | 0.13     |  |
| NO <sub>x</sub>               | 0.53              | 0.54                                                                                                        | 0.67            | 0.67            | 0.57  | 0.09  | 0.54            | -0.50          | 0.40                          | 0.15                         | 0.27                         | 0.13  | 0.13     |  |
| EC                            | 0.61              | 0.59                                                                                                        | 0.68            | 0.67            | 0.57  | 0.07  | 0.61            | -0.53          | 0.49                          | 0.23                         | 0.37                         | 0.13  | 0.20     |  |
| OC                            | 0.50              | 0.46                                                                                                        | 0.52            | 0.52            | 0.41  | 0.01  | 0.54            | -0.40          | 0.43                          | 0.20                         | 0.34                         | 0.17  | 0.17     |  |
| SO <sub>2</sub>               | 0.68              | 0.60                                                                                                        | 0.50            | 0.49            | 0.39  | 0.00  | 0.77            | -0.42          | 0.70                          | 0.47                         | 0.61                         | 0.01  | 0.39     |  |
| O <sub>3</sub>                | -0.30             | -0.29                                                                                                       | -0.59           | -0.56           | -0.42 | 0.08  | -0.36           | 0.29           | -0.20                         | -0.06                        | -0.06                        | -0.34 | 0.12     |  |
| SO <sub>4</sub> <sup>2-</sup> | 0.70              | 0.62                                                                                                        | 0.27            | 0.28            | 0.21  | -0.06 | 0.64            | -0.30          | 0.80                          | 0.63                         | 0.77                         | -0.11 | 0.73     |  |
| NO <sub>3</sub> <sup>-</sup>  | 0.42              | 0.31                                                                                                        | -0.06           | -0.04           | -0.1  | -0.17 | 0.32            | 0.03           | 0.55                          | 0.69                         | 0.66                         | -0.19 | 0.42     |  |
| NH <sub>4</sub> <sup>+</sup>  | 0.64              | 0.53                                                                                                        | 0.13            | 0.15            | 0.07  | -0.14 | 0.56            | -0.17          | 0.78                          | 0.73                         | 0.81                         | -0.13 | 0.67     |  |
| SOA                           | 0.61              | 0.52                                                                                                        | 0.31            | 0.30            | 0.34  | 0.3   | 0.48            | -0.35          | 0.57                          | 0.47                         | 0.62                         | -0.42 | 0.20     |  |
| Sea salt                      | -0.05             | -0.08                                                                                                       | -0.07           | -0.06           | -0.05 | -0.04 | -0.01           | -0.03          | -0.06                         | 0.09                         | -0.04                        | 0.17  | -0.12    |  |

**Table A6. Associations between Prenatal Exposure to Ambient Air Pollution and Asthma Incidence After Age 4 in the Nationwide Cohort of Children Born in Denmark, 1998–2016<sup>a</sup>**

| Pollutant                     | Asthma at any age                                        | Asthma after 4 years of age |
|-------------------------------|----------------------------------------------------------|-----------------------------|
|                               | Same study population as the right column<br>HR (95% CI) | HR (95% CI)                 |
| PM <sub>2.5</sub>             | 1.05 (1.03–1.07)                                         | 1.03 (1.00–1.05)            |
| PM <sub>10</sub>              | 1.05 (1.03–1.06)                                         | 1.03 (1.01–1.05)            |
| NO <sub>2</sub>               | 1.04 (1.02–1.05)                                         | 1.02 (1.00–1.04)            |
| NO <sub>x</sub>               | 1.01 (1.01–1.02)                                         | 1.01 (1.00–1.02)            |
| EC                            | 1.02 (1.01–1.03)                                         | 1.02 (1.00–1.03)            |
| OC                            | 1.08 (1.06–1.09)                                         | 1.05 (1.02–1.08)            |
| SO <sub>2</sub>               | 1.02 (1.01–1.03)                                         | 1.02 (1.00–1.04)            |
| O <sub>3</sub>                | 0.98 (0.96–0.99)                                         | 0.98 (0.95–1.00)            |
| SO <sub>4</sub> <sup>2-</sup> | 1.03 (1.00–1.07)                                         | 0.99 (0.94–1.04)            |
| NO <sub>3</sub> <sup>-</sup>  | 1.01 (1.00–1.03)                                         | 1.00 (0.98–1.03)            |
| NH <sub>4</sub> <sup>+</sup>  | 1.01 (0.98–1.03)                                         | 0.99 (0.96–1.02)            |
| SOA                           | 1.02 (1.01–1.04)                                         | 1.03 (1.01–1.05)            |
| Sea salt                      | 0.99 (0.97–1.00)                                         | 1.00 (0.98–1.03)            |

<sup>a</sup> Restricted to infants born between 1998 and 2012.

Hazard ratio (HR) and 95% confidence intervals (CI) from Cox regression models per fixed increments of the interquartile range ( $\mu\text{g}/\text{m}^3$ ) of the time-weighted average exposures to ambient air pollutants for the full prenatal period of 2.4 for PM<sub>2.5</sub>, 2.7 for PM<sub>10</sub>, 8.7 for NO<sub>2</sub>, 13.4 for NO<sub>x</sub>, 0.3 for EC, 0.5 for OC, 2.7 for SO<sub>2</sub>, 8.5 for O<sub>3</sub>, 0.9 for SO<sub>4</sub><sup>2-</sup>, 0.6 for NO<sub>3</sub><sup>-</sup>, 0.4 for NH<sub>4</sub><sup>+</sup>, 0.1 for SOA and 0.2 for sea salt with age as the time dimension adjusted for year, sex, household income, maternal education, parity, season of birth, smoking during pregnancy and municipality.

The total number of children is 829,851 and the number of asthma cases is 25,739.

**Table A7. Sensitivity Analyses of Associations between Air Pollution and Asthma Incidence in the Nationwide Cohort of Children Born in Denmark, 1998–2016<sup>a</sup>**

| Pollutant                     | Restricted to infants born in<br>Greater Copenhagen | Additional adjustment for<br>area-level SES | Additional adjustment for<br>population density (strata) |
|-------------------------------|-----------------------------------------------------|---------------------------------------------|----------------------------------------------------------|
|                               | HR (95% CI)                                         | HR (95% CI)                                 | HR (95% CI)                                              |
| PM <sub>2.5</sub>             | 1.08 (1.04–1.12)                                    | 1.05 (1.03–1.07)                            | 1.06 (1.04–1.07)                                         |
| PM <sub>10</sub>              | 1.05 (1.03–1.07)                                    | 1.05 (1.03–1.06)                            | 1.05 (1.03–1.06)                                         |
| NO <sub>2</sub>               | 1.03 (1.01–1.06)                                    | 1.04 (1.02–1.05)                            | 1.04 (1.02–1.05)                                         |
| NO <sub>x</sub>               | 1.01 (1.00–1.02)                                    | 1.01 (1.01–1.02)                            | 1.01 (1.01–1.02)                                         |
| EC                            | 1.03 (1.01–1.04)                                    | 1.02 (1.01–1.03)                            | 1.02 (1.02–1.03)                                         |
| OC                            | 1.14 (1.09–1.18)                                    | 1.08 (1.06–1.10)                            | 1.08 (1.06–1.10)                                         |
| SO <sub>2</sub>               | 1.03 (1.00–1.06)                                    | 1.02 (1.01–1.03)                            | 1.02 (1.01–1.03)                                         |
| O <sub>3</sub>                | 0.95 (0.93–0.98)                                    | 0.98 (0.96–0.99)                            | 0.98 (0.96–1.00)                                         |
| SO <sub>4</sub> <sup>2-</sup> | 1.18 (1.09–1.28)                                    | 1.03 (1.00–1.07)                            | 1.04 (1.01–1.08)                                         |
| NO <sub>3</sub> <sup>-</sup>  | 1.03 (1.00–1.07)                                    | 1.01 (1.00–1.03)                            | 1.02 (1.00–1.03)                                         |
| NH <sub>4</sub> <sup>+</sup>  | 1.07 (1.02–1.13)                                    | 1.01 (0.98–1.03)                            | 1.01 (0.99–1.03)                                         |
| SOA                           | 1.02 (0.99–1.05)                                    | 1.02 (1.01–1.04)                            | 1.02 (1.01–1.04)                                         |
| Sea salt                      | 0.96 (0.92–1.00)                                    | 0.99 (0.97–1.00)                            | 0.99 (0.97–1.00)                                         |

<sup>a</sup> Hazard ratio (HR) and 95% confidence intervals (CI) from Cox regression models per fixed increments of the interquartile range ( $\mu\text{g}/\text{m}^3$ ) of the time-weighted average exposures to ambient air pollutants for the full prenatal period of 2.4 for PM<sub>2.5</sub>, 2.7 for PM<sub>10</sub>, 8.7 for NO<sub>2</sub>, 13.4 for NO<sub>x</sub>, 0.3 for EC, 0.5 for OC, 2.7 for SO<sub>2</sub>, 8.5 for O<sub>3</sub>, 0.9 for SO<sub>4</sub><sup>2-</sup>, 0.6 for NO<sub>3</sub><sup>-</sup>, 0.4 for NH<sub>4</sub><sup>+</sup>, 0.1 for SOA, and 0.2 for sea salt with age as the time dimension adjusted for year, sex, household income, maternal education, parity, season of birth, smoking during pregnancy and municipality.

The total number of children is 276,773 and the number of asthma cases is 12,270 in models restricted to Greater Copenhagen. Greater Copenhagen refers to municipality of Copenhagen, Frederiksberg, Dragør, Tårnby, Albertslund, Ballerup, Brøndby, Gentofte, Gladsaxe, Glostrup, Herlev, Hvidovre, Høje-Taastrup, Ishøj, Lyngby-Taarbæk, Rødovre, and Vallensbæk.

The total number of children is 985,760 and the number of asthma cases is 65,143 in models with additional adjustment for area-level SES.

The total number of children is 1,059,987 and the number of asthma cases is 65,143 in models with additional adjustment for population density.

**Table A8. Associations between Prenatal Exposure to Air Pollution and Asthma Incidence by Sex in the Nationwide Cohort of Children Born in Denmark, 1998–2016<sup>a</sup>**

| Pollutant                     | Boys                                     | Girls                                    | P value |
|-------------------------------|------------------------------------------|------------------------------------------|---------|
|                               | (N = 554,044; n = 40,861)<br>HR (95% CI) | (N = 516,110; n = 24,282)<br>HR (95% CI) |         |
| PM <sub>2.5</sub>             | 1.04 (1.02–1.06)                         | 1.08 (1.06–1.11)                         | <0.001  |
| PM <sub>10</sub>              | 1.04 (1.02–1.05)                         | 1.07 (1.05–1.09)                         | 0.01    |
| NO <sub>2</sub>               | 1.03 (1.01–1.05)                         | 1.05 (1.03–1.07)                         | 0.12    |
| NO <sub>x</sub>               | 1.01 (1.00–1.02)                         | 1.02 (1.01–1.03)                         | 0.06    |
| EC                            | 1.02 (1.01–1.03)                         | 1.03 (1.02–1.04)                         | 0.17    |
| OC                            | 1.09 (1.07–1.10)                         | 1.07 (1.05–1.10)                         | 0.35    |
| SO <sub>2</sub>               | 1.01 (1.00–1.02)                         | 1.04 (1.02–1.05)                         | 0.001   |
| O <sub>3</sub>                | 0.98 (0.97–1.00)                         | 0.97 (0.95–0.98)                         | 0.09    |
| SO <sub>4</sub> <sup>2-</sup> | 1.01 (0.98–1.05)                         | 1.09 (1.05–1.13)                         | <0.001  |
| NO <sub>3</sub> <sup>-</sup>  | 1.01 (0.99–1.02)                         | 1.03 (1.01–1.05)                         | 0.03    |
| NH <sub>4</sub> <sup>+</sup>  | 0.99 (0.97–1.01)                         | 1.04 (1.02–1.07)                         | <0.001  |
| SOA                           | 1.02 (1.01–1.04)                         | 1.03 (1.01–1.05)                         | 0.66    |
| Sea salt                      | 0.99 (0.97–1.00)                         | 0.99 (0.97–1.01)                         | 0.59    |

<sup>a</sup> Hazard ratio (HR) and 95% confidence intervals (CI) from Cox regression models per fixed increments of the interquartile range ( $\mu\text{g}/\text{m}^3$ ) of the time-weighted average exposures to ambient air pollutants for the full prenatal period of 2.4 for PM<sub>2.5</sub>, 2.7 for PM<sub>10</sub>, 8.7 for NO<sub>2</sub>, 13.4 for NO<sub>x</sub>, 0.3 for EC, 0.5 for OC, 2.7 for SO<sub>2</sub>, 8.5 for O<sub>3</sub>, 0.9 for SO<sub>4</sub><sup>2-</sup>, 0.6 for NO<sub>3</sub><sup>-</sup>, 0.4 for NH<sub>4</sub><sup>+</sup>, 0.1 for SOA, and 0.2 for sea salt with age as the time dimension adjusted for year, household income, maternal education, parity, season of birth, smoking during pregnancy and municipality.

**Table A9. Study Population Characteristics of Excluded vs. Included and Nonmovers vs. Movers of the Danish National Birth Cohort (DNBC)**

|                                   |                             | % Excluded<br>(N = 57,084) | % Included<br>(N = 22,084) | P value <sup>a</sup> | % Nonmovers<br>(N = 9,507) | % Movers<br>(N = 12, 577) | P value <sup>b</sup> |                                   |                        |      |      |        |      |      |        |                            |      |      |      |      |                                   |         |      |      |        |                              |      |        |                  |        |                  |           |        |                       |         |        |        |        |                                   |      |        |            |         |                              |      |        |                       |         |        |                |        |                 |      |        |            |         |                |      |      |                  |         |                              |                                   |         |                       |        |        |            |         |                                   |                           |      |         |        |         |                 |         |                  |      |                        |      |        |                 |                           |         |      |        |        |                       |         |         |                              |                                   |      |      |                           |        |                        |        |        |        |                  |        |       |                              |                 |      |      |                  |                           |         |        |                       |                           |        |        |                              |         |                       |      |        |         |            |      |        |                       |            |      |      |        |                              |                              |      |                        |      |        |        |                       |         |         |        |      |        |         |         |      |                        |         |        |                              |        |         |                       |        |      |      |        |                        |        |         |         |      |                           |        |      |                           |        |                        |         |       |      |        |         |      |        |                        |      |      |      |        |                              |         |        |      |        |                           |      |        |                              |        |      |      |        |         |      |        |      |      |                       |      |      |      |        |                              |      |      |      |        |      |                       |        |         |      |        |      |      |                        |      |      |      |        |                       |      |        |      |         |      |      |      |         |                        |     |      |      |         |      |      |        |     |                        |      |      |      |         |      |      |        |     |      |      |      |      |         |      |
|-----------------------------------|-----------------------------|----------------------------|----------------------------|----------------------|----------------------------|---------------------------|----------------------|-----------------------------------|------------------------|------|------|--------|------|------|--------|----------------------------|------|------|------|------|-----------------------------------|---------|------|------|--------|------------------------------|------|--------|------------------|--------|------------------|-----------|--------|-----------------------|---------|--------|--------|--------|-----------------------------------|------|--------|------------|---------|------------------------------|------|--------|-----------------------|---------|--------|----------------|--------|-----------------|------|--------|------------|---------|----------------|------|------|------------------|---------|------------------------------|-----------------------------------|---------|-----------------------|--------|--------|------------|---------|-----------------------------------|---------------------------|------|---------|--------|---------|-----------------|---------|------------------|------|------------------------|------|--------|-----------------|---------------------------|---------|------|--------|--------|-----------------------|---------|---------|------------------------------|-----------------------------------|------|------|---------------------------|--------|------------------------|--------|--------|--------|------------------|--------|-------|------------------------------|-----------------|------|------|------------------|---------------------------|---------|--------|-----------------------|---------------------------|--------|--------|------------------------------|---------|-----------------------|------|--------|---------|------------|------|--------|-----------------------|------------|------|------|--------|------------------------------|------------------------------|------|------------------------|------|--------|--------|-----------------------|---------|---------|--------|------|--------|---------|---------|------|------------------------|---------|--------|------------------------------|--------|---------|-----------------------|--------|------|------|--------|------------------------|--------|---------|---------|------|---------------------------|--------|------|---------------------------|--------|------------------------|---------|-------|------|--------|---------|------|--------|------------------------|------|------|------|--------|------------------------------|---------|--------|------|--------|---------------------------|------|--------|------------------------------|--------|------|------|--------|---------|------|--------|------|------|-----------------------|------|------|------|--------|------------------------------|------|------|------|--------|------|-----------------------|--------|---------|------|--------|------|------|------------------------|------|------|------|--------|-----------------------|------|--------|------|---------|------|------|------|---------|------------------------|-----|------|------|---------|------|------|--------|-----|------------------------|------|------|------|---------|------|------|--------|-----|------|------|------|------|---------|------|
| Sex                               | Boy                         | 51.8                       | 49.9                       | <0.001               | 50.4                       | 49.6                      | 0.25                 |                                   |                        |      |      |        |      |      |        |                            |      |      |      |      |                                   |         |      |      |        |                              |      |        |                  |        |                  |           |        |                       |         |        |        |        |                                   |      |        |            |         |                              |      |        |                       |         |        |                |        |                 |      |        |            |         |                |      |      |                  |         |                              |                                   |         |                       |        |        |            |         |                                   |                           |      |         |        |         |                 |         |                  |      |                        |      |        |                 |                           |         |      |        |        |                       |         |         |                              |                                   |      |      |                           |        |                        |        |        |        |                  |        |       |                              |                 |      |      |                  |                           |         |        |                       |                           |        |        |                              |         |                       |      |        |         |            |      |        |                       |            |      |      |        |                              |                              |      |                        |      |        |        |                       |         |         |        |      |        |         |         |      |                        |         |        |                              |        |         |                       |        |      |      |        |                        |        |         |         |      |                           |        |      |                           |        |                        |         |       |      |        |         |      |        |                        |      |      |      |        |                              |         |        |      |        |                           |      |        |                              |        |      |      |        |         |      |        |      |      |                       |      |      |      |        |                              |      |      |      |        |      |                       |        |         |      |        |      |      |                        |      |      |      |        |                       |      |        |      |         |      |      |      |         |                        |     |      |      |         |      |      |        |     |                        |      |      |      |         |      |      |        |     |      |      |      |      |         |      |
|                                   | Girl                        | 48.2                       | 50.1                       |                      | 49.6                       | 50.4                      |                      | Season of delivery                | Winter (Jan, Feb, Dec) | 25.9 | 24.6 | <0.001 | 24.6 | 24.6 | 0.06   | Spring (March, April, May) | 25.1 | 28.9 | 29.8 | 28.2 | Summer (June, July, August)       | 25.8    | 24.7 | 24.4 | 24.9   | Fall (Sept, Oct, Nov)        | 23.1 | 21.8   | 21.2             | 22.2   | Year of delivery | 1998–2002 | 94.9   | 97.6                  | <0.001  | 97.9   | 97.4   | 0.09   | 2003–2008                         | 5.1  | 2.4    | 2.1        | 2.6     | Maternal education           | Low  | 16.6   | 8.5                   | <0.001  | 7.3    | 9.4            | <0.001 | Middle          | 51.2 | 48.1   | 46.8       | 49.1    | High           | 32.2 | 43.4 | 45.9             | 41.5    | Household income             | Low                               | 20.3    | 13.5                  | <0.001 | 8.5    | 17.4       | <0.001  | Middle                            | 41.6                      | 41.7 | 43.4    | 40.4   | High    | 38.1            | 44.7    | 48.1             | 42.2 | Older siblings         | No   | 47.0   | 45.5            | <0.001                    | 32.5    | 55.4 | <0.001 | Yes    | 53.0                  | 54.5    | 67.5    | 44.6                         | Maternal smoking during pregnancy | No   | 71.7 | 80.8                      | <0.001 | 83.9                   | 78.5   | <0.001 | Yes    | 28.2             | 19.2   | 16.1  | 21.5                         | Maternal asthma | No   | 91.0 | 91.8             | <0.001                    | 92.2    | 91.6   | 0.08                  | Yes                       | 9.0    | 8.2    | 7.8                          | 8.4     | Child asthma (ICD-10) | No   | 91.6   | 93.3    | <0.001     | 93.4 | 93.2   | 0.51                  | Yes        | 8.4  | 6.7  | 6.6    | 6.8                          | Pets in the home             | No   | 54.9                   | 58.6 | <0.001 | 52.1   | 63.4                  | <0.001  | Yes     | 45.0   | 41.4 | 47.9   | 36.6    | Missing | 0.1  |                        |         |        | Breast fed                   | No     | 18.7    | 25.8                  | 0.16   | 23.8 | 27.4 | <0.001 | Yes                    | 52.3   | 74.2    | 76.2    | 72.6 | Missing                   | 29.0   |      |                           |        | Daycare                | No      | 62.1  | 88.4 | <0.001 | 87.4    | 89.2 | <0.001 | Yes                    | 8.7  | 11.6 | 12.6 | 10.8   | Missing                      | 29.2    |        |      |        | Postnatal exposure to ETS | No   | 24.4   | 82.9                         | <0.001 | 83.8 | 82.2 | 0.003  | Yes     | 6.6  | 17.1   | 16.2 | 17.8 | Missing               | 69.0 |      |      |        | Mold or dampness in the home | No   | 12.9 | 41.3 | <0.001 | 38.9 | 43.1                  | <0.001 | Yes     | 16.8 | 58.7   | 61.1 | 56.9 | Missing                | 70.3 |      |      |        | Gas stove in the home | No   | 27.7   | 92.5 | <0.001  | 92.9 | 92.2 | 0.05 | Yes     | 3.1                    | 7.5 | 7.1  | 7.8  | Missing | 69.2 |      |        |     | Wood stove in the home | No   | 18.3 | 57.0 | <0.001  | 53.2 | 60.0 | <0.001 | Yes | 12.5 | 43.0 | 46.8 | 40.0 | Missing | 69.2 |
| Season of delivery                | Winter (Jan, Feb, Dec)      | 25.9                       | 24.6                       | <0.001               | 24.6                       | 24.6                      | 0.06                 |                                   |                        |      |      |        |      |      |        |                            |      |      |      |      |                                   |         |      |      |        |                              |      |        |                  |        |                  |           |        |                       |         |        |        |        |                                   |      |        |            |         |                              |      |        |                       |         |        |                |        |                 |      |        |            |         |                |      |      |                  |         |                              |                                   |         |                       |        |        |            |         |                                   |                           |      |         |        |         |                 |         |                  |      |                        |      |        |                 |                           |         |      |        |        |                       |         |         |                              |                                   |      |      |                           |        |                        |        |        |        |                  |        |       |                              |                 |      |      |                  |                           |         |        |                       |                           |        |        |                              |         |                       |      |        |         |            |      |        |                       |            |      |      |        |                              |                              |      |                        |      |        |        |                       |         |         |        |      |        |         |         |      |                        |         |        |                              |        |         |                       |        |      |      |        |                        |        |         |         |      |                           |        |      |                           |        |                        |         |       |      |        |         |      |        |                        |      |      |      |        |                              |         |        |      |        |                           |      |        |                              |        |      |      |        |         |      |        |      |      |                       |      |      |      |        |                              |      |      |      |        |      |                       |        |         |      |        |      |      |                        |      |      |      |        |                       |      |        |      |         |      |      |      |         |                        |     |      |      |         |      |      |        |     |                        |      |      |      |         |      |      |        |     |      |      |      |      |         |      |
|                                   | Spring (March, April, May)  | 25.1                       | 28.9                       |                      | 29.8                       | 28.2                      |                      |                                   |                        |      |      |        |      |      |        |                            |      |      |      |      |                                   |         |      |      |        |                              |      |        |                  |        |                  |           |        |                       |         |        |        |        |                                   |      |        |            |         |                              |      |        |                       |         |        |                |        |                 |      |        |            |         |                |      |      |                  |         |                              |                                   |         |                       |        |        |            |         |                                   |                           |      |         |        |         |                 |         |                  |      |                        |      |        |                 |                           |         |      |        |        |                       |         |         |                              |                                   |      |      |                           |        |                        |        |        |        |                  |        |       |                              |                 |      |      |                  |                           |         |        |                       |                           |        |        |                              |         |                       |      |        |         |            |      |        |                       |            |      |      |        |                              |                              |      |                        |      |        |        |                       |         |         |        |      |        |         |         |      |                        |         |        |                              |        |         |                       |        |      |      |        |                        |        |         |         |      |                           |        |      |                           |        |                        |         |       |      |        |         |      |        |                        |      |      |      |        |                              |         |        |      |        |                           |      |        |                              |        |      |      |        |         |      |        |      |      |                       |      |      |      |        |                              |      |      |      |        |      |                       |        |         |      |        |      |      |                        |      |      |      |        |                       |      |        |      |         |      |      |      |         |                        |     |      |      |         |      |      |        |     |                        |      |      |      |         |      |      |        |     |      |      |      |      |         |      |
|                                   | Summer (June, July, August) | 25.8                       | 24.7                       |                      | 24.4                       | 24.9                      |                      |                                   |                        |      |      |        |      |      |        |                            |      |      |      |      |                                   |         |      |      |        |                              |      |        |                  |        |                  |           |        |                       |         |        |        |        |                                   |      |        |            |         |                              |      |        |                       |         |        |                |        |                 |      |        |            |         |                |      |      |                  |         |                              |                                   |         |                       |        |        |            |         |                                   |                           |      |         |        |         |                 |         |                  |      |                        |      |        |                 |                           |         |      |        |        |                       |         |         |                              |                                   |      |      |                           |        |                        |        |        |        |                  |        |       |                              |                 |      |      |                  |                           |         |        |                       |                           |        |        |                              |         |                       |      |        |         |            |      |        |                       |            |      |      |        |                              |                              |      |                        |      |        |        |                       |         |         |        |      |        |         |         |      |                        |         |        |                              |        |         |                       |        |      |      |        |                        |        |         |         |      |                           |        |      |                           |        |                        |         |       |      |        |         |      |        |                        |      |      |      |        |                              |         |        |      |        |                           |      |        |                              |        |      |      |        |         |      |        |      |      |                       |      |      |      |        |                              |      |      |      |        |      |                       |        |         |      |        |      |      |                        |      |      |      |        |                       |      |        |      |         |      |      |      |         |                        |     |      |      |         |      |      |        |     |                        |      |      |      |         |      |      |        |     |      |      |      |      |         |      |
|                                   | Fall (Sept, Oct, Nov)       | 23.1                       | 21.8                       |                      | 21.2                       | 22.2                      |                      | Year of delivery                  | 1998–2002              | 94.9 | 97.6 | <0.001 | 97.9 | 97.4 | 0.09   | 2003–2008                  | 5.1  | 2.4  | 2.1  | 2.6  | Maternal education                | Low     | 16.6 | 8.5  | <0.001 | 7.3                          | 9.4  | <0.001 | Middle           | 51.2   | 48.1             | 46.8      | 49.1   | High                  | 32.2    | 43.4   | 45.9   | 41.5   | Household income                  | Low  | 20.3   | 13.5       | <0.001  | 8.5                          | 17.4 | <0.001 | Middle                | 41.6    | 41.7   | 43.4           | 40.4   | High            | 38.1 | 44.7   | 48.1       | 42.2    | Older siblings | No   | 47.0 | 45.5             | <0.001  | 32.5                         | 55.4                              | <0.001  | Yes                   | 53.0   | 54.5   | 67.5       | 44.6    | Maternal smoking during pregnancy | No                        | 71.7 | 80.8    | <0.001 | 83.9    | 78.5            | <0.001  | Yes              | 28.2 | 19.2                   | 16.1 | 21.5   | Maternal asthma | No                        | 91.0    | 91.8 | <0.001 | 92.2   | 91.6                  | 0.08    | Yes     | 9.0                          | 8.2                               | 7.8  | 8.4  | Child asthma (ICD-10)     | No     | 91.6                   | 93.3   | <0.001 | 93.4   | 93.2             | 0.51   | Yes   | 8.4                          | 6.7             | 6.6  | 6.8  | Pets in the home | No                        | 54.9    | 58.6   | <0.001                | 52.1                      | 63.4   | <0.001 | Yes                          | 45.0    | 41.4                  | 47.9 | 36.6   | Missing | 0.1        |      |        |                       | Breast fed | No   | 18.7 | 25.8   | 0.16                         | 23.8                         | 27.4 | <0.001                 | Yes  | 52.3   | 74.2   | 76.2                  | 72.6    | Missing | 29.0   |      |        |         | Daycare | No   | 62.1                   | 88.4    | <0.001 | 87.4                         | 89.2   | <0.001  | Yes                   | 8.7    | 11.6 | 12.6 | 10.8   | Missing                | 29.2   |         |         |      | Postnatal exposure to ETS | No     | 24.4 | 82.9                      | <0.001 | 83.8                   | 82.2    | 0.003 | Yes  | 6.6    | 17.1    | 16.2 | 17.8   | Missing                | 69.0 |      |      |        | Mold or dampness in the home | No      | 12.9   | 41.3 | <0.001 | 38.9                      | 43.1 | <0.001 | Yes                          | 16.8   | 58.7 | 61.1 | 56.9   | Missing | 70.3 |        |      |      | Gas stove in the home | No   | 27.7 | 92.5 | <0.001 | 92.9                         | 92.2 | 0.05 | Yes  | 3.1    | 7.5  | 7.1                   | 7.8    | Missing | 69.2 |        |      |      | Wood stove in the home | No   | 18.3 | 57.0 | <0.001 | 53.2                  | 60.0 | <0.001 | Yes  | 12.5    | 43.0 | 46.8 | 40.0 | Missing | 69.2                   |     |      |      |         |      |      |        |     |                        |      |      |      |         |      |      |        |     |      |      |      |      |         |      |
| Year of delivery                  | 1998–2002                   | 94.9                       | 97.6                       | <0.001               | 97.9                       | 97.4                      | 0.09                 |                                   |                        |      |      |        |      |      |        |                            |      |      |      |      |                                   |         |      |      |        |                              |      |        |                  |        |                  |           |        |                       |         |        |        |        |                                   |      |        |            |         |                              |      |        |                       |         |        |                |        |                 |      |        |            |         |                |      |      |                  |         |                              |                                   |         |                       |        |        |            |         |                                   |                           |      |         |        |         |                 |         |                  |      |                        |      |        |                 |                           |         |      |        |        |                       |         |         |                              |                                   |      |      |                           |        |                        |        |        |        |                  |        |       |                              |                 |      |      |                  |                           |         |        |                       |                           |        |        |                              |         |                       |      |        |         |            |      |        |                       |            |      |      |        |                              |                              |      |                        |      |        |        |                       |         |         |        |      |        |         |         |      |                        |         |        |                              |        |         |                       |        |      |      |        |                        |        |         |         |      |                           |        |      |                           |        |                        |         |       |      |        |         |      |        |                        |      |      |      |        |                              |         |        |      |        |                           |      |        |                              |        |      |      |        |         |      |        |      |      |                       |      |      |      |        |                              |      |      |      |        |      |                       |        |         |      |        |      |      |                        |      |      |      |        |                       |      |        |      |         |      |      |      |         |                        |     |      |      |         |      |      |        |     |                        |      |      |      |         |      |      |        |     |      |      |      |      |         |      |
|                                   | 2003–2008                   | 5.1                        | 2.4                        |                      | 2.1                        | 2.6                       |                      | Maternal education                | Low                    | 16.6 | 8.5  | <0.001 | 7.3  | 9.4  | <0.001 | Middle                     | 51.2 | 48.1 | 46.8 | 49.1 |                                   | High    | 32.2 | 43.4 |        | 45.9                         | 41.5 |        | Household income | Low    | 20.3             | 13.5      | <0.001 | 8.5                   | 17.4    | <0.001 | Middle | 41.6   |                                   | 41.7 | 43.4   | 40.4       |         | High                         | 38.1 |        | 44.7                  | 48.1    | 42.2   | Older siblings | No     | 47.0            | 45.5 | <0.001 | 32.5       | 55.4    | <0.001         | Yes  | 53.0 | 54.5             | 67.5    | 44.6                         | Maternal smoking during pregnancy | No      | 71.7                  | 80.8   | <0.001 | 83.9       | 78.5    | <0.001                            | Yes                       | 28.2 | 19.2    | 16.1   | 21.5    | Maternal asthma | No      | 91.0             | 91.8 | <0.001                 | 92.2 | 91.6   | 0.08            | Yes                       | 9.0     | 8.2  | 7.8    | 8.4    | Child asthma (ICD-10) | No      | 91.6    | 93.3                         | <0.001                            | 93.4 | 93.2 | 0.51                      | Yes    | 8.4                    | 6.7    | 6.6    | 6.8    | Pets in the home | No     | 54.9  | 58.6                         | <0.001          | 52.1 | 63.4 |                  | <0.001                    | Yes     | 45.0   |                       | 41.4                      | 47.9   |        | 36.6                         | Missing | 0.1                   |      |        |         | Breast fed | No   | 18.7   | 25.8                  |            | 0.16 | 23.8 | 27.4   |                              | <0.001                       | Yes  |                        | 52.3 | 74.2   | 76.2   | 72.6                  | Missing | 29.0    |        |      |        | Daycare |         | No   | 62.1                   | 88.4    |        | <0.001                       | 87.4   |         | 89.2                  | <0.001 | Yes  | 8.7  | 11.6   | 12.6                   | 10.8   | Missing | 29.2    |      |                           |        |      | Postnatal exposure to ETS |        | No                     | 24.4    |       | 82.9 | <0.001 | 83.8    | 82.2 | 0.003  | Yes                    | 6.6  | 17.1 | 16.2 | 17.8   |                              | Missing | 69.0   |      |        |                           |      |        | Mold or dampness in the home | No     | 12.9 | 41.3 | <0.001 | 38.9    | 43.1 | <0.001 | Yes  | 16.8 |                       | 58.7 | 61.1 | 56.9 |        | Missing                      | 70.3 |      |      |        |      | Gas stove in the home | No     | 27.7    | 92.5 | <0.001 | 92.9 | 92.2 |                        | 0.05 | Yes  | 3.1  |        | 7.5                   | 7.1  |        | 7.8  | Missing | 69.2 |      |      |         | Wood stove in the home | No  | 18.3 | 57.0 | <0.001  | 53.2 | 60.0 | <0.001 | Yes | 12.5                   | 43.0 | 46.8 | 40.0 | Missing | 69.2 |      |        |     |      |      |      |      |         |      |
| Maternal education                | Low                         | 16.6                       | 8.5                        | <0.001               | 7.3                        | 9.4                       | <0.001               |                                   |                        |      |      |        |      |      |        |                            |      |      |      |      |                                   |         |      |      |        |                              |      |        |                  |        |                  |           |        |                       |         |        |        |        |                                   |      |        |            |         |                              |      |        |                       |         |        |                |        |                 |      |        |            |         |                |      |      |                  |         |                              |                                   |         |                       |        |        |            |         |                                   |                           |      |         |        |         |                 |         |                  |      |                        |      |        |                 |                           |         |      |        |        |                       |         |         |                              |                                   |      |      |                           |        |                        |        |        |        |                  |        |       |                              |                 |      |      |                  |                           |         |        |                       |                           |        |        |                              |         |                       |      |        |         |            |      |        |                       |            |      |      |        |                              |                              |      |                        |      |        |        |                       |         |         |        |      |        |         |         |      |                        |         |        |                              |        |         |                       |        |      |      |        |                        |        |         |         |      |                           |        |      |                           |        |                        |         |       |      |        |         |      |        |                        |      |      |      |        |                              |         |        |      |        |                           |      |        |                              |        |      |      |        |         |      |        |      |      |                       |      |      |      |        |                              |      |      |      |        |      |                       |        |         |      |        |      |      |                        |      |      |      |        |                       |      |        |      |         |      |      |      |         |                        |     |      |      |         |      |      |        |     |                        |      |      |      |         |      |      |        |     |      |      |      |      |         |      |
|                                   | Middle                      | 51.2                       | 48.1                       |                      | 46.8                       | 49.1                      |                      |                                   |                        |      |      |        |      |      |        |                            |      |      |      |      |                                   |         |      |      |        |                              |      |        |                  |        |                  |           |        |                       |         |        |        |        |                                   |      |        |            |         |                              |      |        |                       |         |        |                |        |                 |      |        |            |         |                |      |      |                  |         |                              |                                   |         |                       |        |        |            |         |                                   |                           |      |         |        |         |                 |         |                  |      |                        |      |        |                 |                           |         |      |        |        |                       |         |         |                              |                                   |      |      |                           |        |                        |        |        |        |                  |        |       |                              |                 |      |      |                  |                           |         |        |                       |                           |        |        |                              |         |                       |      |        |         |            |      |        |                       |            |      |      |        |                              |                              |      |                        |      |        |        |                       |         |         |        |      |        |         |         |      |                        |         |        |                              |        |         |                       |        |      |      |        |                        |        |         |         |      |                           |        |      |                           |        |                        |         |       |      |        |         |      |        |                        |      |      |      |        |                              |         |        |      |        |                           |      |        |                              |        |      |      |        |         |      |        |      |      |                       |      |      |      |        |                              |      |      |      |        |      |                       |        |         |      |        |      |      |                        |      |      |      |        |                       |      |        |      |         |      |      |      |         |                        |     |      |      |         |      |      |        |     |                        |      |      |      |         |      |      |        |     |      |      |      |      |         |      |
|                                   | High                        | 32.2                       | 43.4                       |                      | 45.9                       | 41.5                      |                      | Household income                  | Low                    | 20.3 | 13.5 | <0.001 | 8.5  | 17.4 | <0.001 | Middle                     | 41.6 | 41.7 | 43.4 | 40.4 | High                              | 38.1    | 44.7 | 48.1 | 42.2   | Older siblings               | No   | 47.0   | 45.5             | <0.001 | 32.5             | 55.4      | <0.001 | Yes                   | 53.0    | 54.5   | 67.5   | 44.6   | Maternal smoking during pregnancy | No   | 71.7   | 80.8       | <0.001  | 83.9                         | 78.5 | <0.001 | Yes                   | 28.2    | 19.2   | 16.1           | 21.5   | Maternal asthma | No   | 91.0   | 91.8       | <0.001  | 92.2           | 91.6 | 0.08 | Yes              | 9.0     | 8.2                          | 7.8                               | 8.4     | Child asthma (ICD-10) | No     | 91.6   | 93.3       | <0.001  | 93.4                              | 93.2                      | 0.51 | Yes     | 8.4    | 6.7     | 6.6             | 6.8     | Pets in the home | No   | 54.9                   | 58.6 | <0.001 | 52.1            | 63.4                      | <0.001  | Yes  | 45.0   | 41.4   | 47.9                  | 36.6    | Missing | 0.1                          |                                   |      |      | Breast fed                | No     | 18.7                   | 25.8   | 0.16   | 23.8   | 27.4             | <0.001 | Yes   | 52.3                         | 74.2            | 76.2 | 72.6 | Missing          | 29.0                      |         |        |                       | Daycare                   | No     | 62.1   | 88.4                         | <0.001  | 87.4                  | 89.2 | <0.001 | Yes     | 8.7        | 11.6 | 12.6   | 10.8                  | Missing    | 29.2 |      |        |                              | Postnatal exposure to ETS    | No   | 24.4                   | 82.9 | <0.001 | 83.8   | 82.2                  | 0.003   | Yes     | 6.6    | 17.1 | 16.2   | 17.8    | Missing | 69.0 |                        |         |        | Mold or dampness in the home | No     | 12.9    | 41.3                  | <0.001 | 38.9 | 43.1 | <0.001 | Yes                    | 16.8   | 58.7    | 61.1    | 56.9 | Missing                   | 70.3   |      |                           |        | Gas stove in the home  | No      | 27.7  | 92.5 | <0.001 | 92.9    | 92.2 | 0.05   | Yes                    | 3.1  | 7.5  | 7.1  | 7.8    | Missing                      | 69.2    |        |      |        | Wood stove in the home    | No   | 18.3   | 57.0                         | <0.001 | 53.2 | 60.0 | <0.001 | Yes     | 12.5 | 43.0   | 46.8 | 40.0 | Missing               | 69.2 |      |      |        |                              |      |      |      |        |      |                       |        |         |      |        |      |      |                        |      |      |      |        |                       |      |        |      |         |      |      |      |         |                        |     |      |      |         |      |      |        |     |                        |      |      |      |         |      |      |        |     |      |      |      |      |         |      |
| Household income                  | Low                         | 20.3                       | 13.5                       | <0.001               | 8.5                        | 17.4                      | <0.001               |                                   |                        |      |      |        |      |      |        |                            |      |      |      |      |                                   |         |      |      |        |                              |      |        |                  |        |                  |           |        |                       |         |        |        |        |                                   |      |        |            |         |                              |      |        |                       |         |        |                |        |                 |      |        |            |         |                |      |      |                  |         |                              |                                   |         |                       |        |        |            |         |                                   |                           |      |         |        |         |                 |         |                  |      |                        |      |        |                 |                           |         |      |        |        |                       |         |         |                              |                                   |      |      |                           |        |                        |        |        |        |                  |        |       |                              |                 |      |      |                  |                           |         |        |                       |                           |        |        |                              |         |                       |      |        |         |            |      |        |                       |            |      |      |        |                              |                              |      |                        |      |        |        |                       |         |         |        |      |        |         |         |      |                        |         |        |                              |        |         |                       |        |      |      |        |                        |        |         |         |      |                           |        |      |                           |        |                        |         |       |      |        |         |      |        |                        |      |      |      |        |                              |         |        |      |        |                           |      |        |                              |        |      |      |        |         |      |        |      |      |                       |      |      |      |        |                              |      |      |      |        |      |                       |        |         |      |        |      |      |                        |      |      |      |        |                       |      |        |      |         |      |      |      |         |                        |     |      |      |         |      |      |        |     |                        |      |      |      |         |      |      |        |     |      |      |      |      |         |      |
|                                   | Middle                      | 41.6                       | 41.7                       |                      | 43.4                       | 40.4                      |                      |                                   |                        |      |      |        |      |      |        |                            |      |      |      |      |                                   |         |      |      |        |                              |      |        |                  |        |                  |           |        |                       |         |        |        |        |                                   |      |        |            |         |                              |      |        |                       |         |        |                |        |                 |      |        |            |         |                |      |      |                  |         |                              |                                   |         |                       |        |        |            |         |                                   |                           |      |         |        |         |                 |         |                  |      |                        |      |        |                 |                           |         |      |        |        |                       |         |         |                              |                                   |      |      |                           |        |                        |        |        |        |                  |        |       |                              |                 |      |      |                  |                           |         |        |                       |                           |        |        |                              |         |                       |      |        |         |            |      |        |                       |            |      |      |        |                              |                              |      |                        |      |        |        |                       |         |         |        |      |        |         |         |      |                        |         |        |                              |        |         |                       |        |      |      |        |                        |        |         |         |      |                           |        |      |                           |        |                        |         |       |      |        |         |      |        |                        |      |      |      |        |                              |         |        |      |        |                           |      |        |                              |        |      |      |        |         |      |        |      |      |                       |      |      |      |        |                              |      |      |      |        |      |                       |        |         |      |        |      |      |                        |      |      |      |        |                       |      |        |      |         |      |      |      |         |                        |     |      |      |         |      |      |        |     |                        |      |      |      |         |      |      |        |     |      |      |      |      |         |      |
|                                   | High                        | 38.1                       | 44.7                       |                      | 48.1                       | 42.2                      |                      | Older siblings                    | No                     | 47.0 | 45.5 | <0.001 | 32.5 | 55.4 | <0.001 | Yes                        | 53.0 | 54.5 | 67.5 | 44.6 | Maternal smoking during pregnancy | No      | 71.7 | 80.8 | <0.001 | 83.9                         | 78.5 | <0.001 | Yes              | 28.2   | 19.2             | 16.1      | 21.5   | Maternal asthma       | No      | 91.0   | 91.8   | <0.001 | 92.2                              | 91.6 | 0.08   | Yes        | 9.0     | 8.2                          | 7.8  | 8.4    | Child asthma (ICD-10) | No      | 91.6   | 93.3           | <0.001 | 93.4            | 93.2 | 0.51   | Yes        | 8.4     | 6.7            | 6.6  | 6.8  | Pets in the home | No      | 54.9                         | 58.6                              | <0.001  | 52.1                  | 63.4   | <0.001 | Yes        | 45.0    | 41.4                              | 47.9                      | 36.6 | Missing | 0.1    |         |                 |         | Breast fed       | No   | 18.7                   | 25.8 | 0.16   | 23.8            | 27.4                      | <0.001  | Yes  | 52.3   | 74.2   | 76.2                  | 72.6    | Missing | 29.0                         |                                   |      |      | Daycare                   | No     | 62.1                   | 88.4   | <0.001 | 87.4   | 89.2             | <0.001 | Yes   | 8.7                          | 11.6            | 12.6 | 10.8 | Missing          | 29.2                      |         |        |                       | Postnatal exposure to ETS | No     | 24.4   | 82.9                         | <0.001  | 83.8                  | 82.2 | 0.003  | Yes     | 6.6        | 17.1 | 16.2   | 17.8                  | Missing    | 69.0 |      |        |                              | Mold or dampness in the home | No   | 12.9                   | 41.3 | <0.001 | 38.9   | 43.1                  | <0.001  | Yes     | 16.8   | 58.7 | 61.1   | 56.9    | Missing | 70.3 |                        |         |        | Gas stove in the home        | No     | 27.7    | 92.5                  | <0.001 | 92.9 | 92.2 | 0.05   | Yes                    | 3.1    | 7.5     | 7.1     | 7.8  | Missing                   | 69.2   |      |                           |        | Wood stove in the home | No      | 18.3  | 57.0 | <0.001 | 53.2    | 60.0 | <0.001 | Yes                    | 12.5 | 43.0 | 46.8 | 40.0   | Missing                      | 69.2    |        |      |        |                           |      |        |                              |        |      |      |        |         |      |        |      |      |                       |      |      |      |        |                              |      |      |      |        |      |                       |        |         |      |        |      |      |                        |      |      |      |        |                       |      |        |      |         |      |      |      |         |                        |     |      |      |         |      |      |        |     |                        |      |      |      |         |      |      |        |     |      |      |      |      |         |      |
| Older siblings                    | No                          | 47.0                       | 45.5                       | <0.001               | 32.5                       | 55.4                      | <0.001               |                                   |                        |      |      |        |      |      |        |                            |      |      |      |      |                                   |         |      |      |        |                              |      |        |                  |        |                  |           |        |                       |         |        |        |        |                                   |      |        |            |         |                              |      |        |                       |         |        |                |        |                 |      |        |            |         |                |      |      |                  |         |                              |                                   |         |                       |        |        |            |         |                                   |                           |      |         |        |         |                 |         |                  |      |                        |      |        |                 |                           |         |      |        |        |                       |         |         |                              |                                   |      |      |                           |        |                        |        |        |        |                  |        |       |                              |                 |      |      |                  |                           |         |        |                       |                           |        |        |                              |         |                       |      |        |         |            |      |        |                       |            |      |      |        |                              |                              |      |                        |      |        |        |                       |         |         |        |      |        |         |         |      |                        |         |        |                              |        |         |                       |        |      |      |        |                        |        |         |         |      |                           |        |      |                           |        |                        |         |       |      |        |         |      |        |                        |      |      |      |        |                              |         |        |      |        |                           |      |        |                              |        |      |      |        |         |      |        |      |      |                       |      |      |      |        |                              |      |      |      |        |      |                       |        |         |      |        |      |      |                        |      |      |      |        |                       |      |        |      |         |      |      |      |         |                        |     |      |      |         |      |      |        |     |                        |      |      |      |         |      |      |        |     |      |      |      |      |         |      |
|                                   | Yes                         | 53.0                       | 54.5                       |                      | 67.5                       | 44.6                      |                      | Maternal smoking during pregnancy | No                     | 71.7 | 80.8 | <0.001 | 83.9 | 78.5 | <0.001 | Yes                        | 28.2 | 19.2 | 16.1 | 21.5 | Maternal asthma                   | No      | 91.0 | 91.8 | <0.001 | 92.2                         | 91.6 | 0.08   | Yes              | 9.0    | 8.2              | 7.8       | 8.4    | Child asthma (ICD-10) | No      | 91.6   | 93.3   | <0.001 | 93.4                              | 93.2 | 0.51   | Yes        | 8.4     | 6.7                          | 6.6  | 6.8    | Pets in the home      | No      | 54.9   | 58.6           | <0.001 | 52.1            | 63.4 | <0.001 | Yes        | 45.0    | 41.4           | 47.9 | 36.6 |                  | Missing | 0.1                          |                                   |         |                       |        |        | Breast fed | No      | 18.7                              | 25.8                      | 0.16 | 23.8    | 27.4   | <0.001  | Yes             | 52.3    |                  | 74.2 | 76.2                   | 72.6 |        | Missing         | 29.0                      |         |      |        |        | Daycare               | No      | 62.1    | 88.4                         | <0.001                            | 87.4 | 89.2 |                           | <0.001 | Yes                    | 8.7    |        | 11.6   | 12.6             |        | 10.8  | Missing                      | 29.2            |      |      |                  | Postnatal exposure to ETS | No      | 24.4   | 82.9                  |                           | <0.001 | 83.8   | 82.2                         |         | 0.003                 | Yes  |        | 6.6     | 17.1       | 16.2 | 17.8   | Missing               | 69.0       |      |      |        | Mold or dampness in the home |                              | No   | 12.9                   | 41.3 |        | <0.001 | 38.9                  |         | 43.1    | <0.001 | Yes  | 16.8   | 58.7    | 61.1    | 56.9 | Missing                | 70.3    |        |                              |        |         | Gas stove in the home |        | No   | 27.7 |        | 92.5                   | <0.001 | 92.9    | 92.2    | 0.05 | Yes                       | 3.1    | 7.5  | 7.1                       | 7.8    |                        | Missing | 69.2  |      |        |         |      |        | Wood stove in the home | No   | 18.3 | 57.0 | <0.001 | 53.2                         | 60.0    | <0.001 | Yes  | 12.5   | 43.0                      | 46.8 | 40.0   | Missing                      | 69.2   |      |      |        |         |      |        |      |      |                       |      |      |      |        |                              |      |      |      |        |      |                       |        |         |      |        |      |      |                        |      |      |      |        |                       |      |        |      |         |      |      |      |         |                        |     |      |      |         |      |      |        |     |                        |      |      |      |         |      |      |        |     |      |      |      |      |         |      |
| Maternal smoking during pregnancy | No                          | 71.7                       | 80.8                       | <0.001               | 83.9                       | 78.5                      | <0.001               |                                   |                        |      |      |        |      |      |        |                            |      |      |      |      |                                   |         |      |      |        |                              |      |        |                  |        |                  |           |        |                       |         |        |        |        |                                   |      |        |            |         |                              |      |        |                       |         |        |                |        |                 |      |        |            |         |                |      |      |                  |         |                              |                                   |         |                       |        |        |            |         |                                   |                           |      |         |        |         |                 |         |                  |      |                        |      |        |                 |                           |         |      |        |        |                       |         |         |                              |                                   |      |      |                           |        |                        |        |        |        |                  |        |       |                              |                 |      |      |                  |                           |         |        |                       |                           |        |        |                              |         |                       |      |        |         |            |      |        |                       |            |      |      |        |                              |                              |      |                        |      |        |        |                       |         |         |        |      |        |         |         |      |                        |         |        |                              |        |         |                       |        |      |      |        |                        |        |         |         |      |                           |        |      |                           |        |                        |         |       |      |        |         |      |        |                        |      |      |      |        |                              |         |        |      |        |                           |      |        |                              |        |      |      |        |         |      |        |      |      |                       |      |      |      |        |                              |      |      |      |        |      |                       |        |         |      |        |      |      |                        |      |      |      |        |                       |      |        |      |         |      |      |      |         |                        |     |      |      |         |      |      |        |     |                        |      |      |      |         |      |      |        |     |      |      |      |      |         |      |
|                                   | Yes                         | 28.2                       | 19.2                       |                      | 16.1                       | 21.5                      |                      | Maternal asthma                   | No                     | 91.0 | 91.8 | <0.001 | 92.2 | 91.6 | 0.08   | Yes                        | 9.0  | 8.2  | 7.8  | 8.4  | Child asthma (ICD-10)             | No      | 91.6 | 93.3 | <0.001 | 93.4                         | 93.2 | 0.51   | Yes              | 8.4    | 6.7              | 6.6       | 6.8    | Pets in the home      | No      | 54.9   | 58.6   | <0.001 | 52.1                              | 63.4 | <0.001 | Yes        | 45.0    | 41.4                         | 47.9 | 36.6   |                       | Missing | 0.1    |                |        |                 |      |        | Breast fed | No      | 18.7           | 25.8 | 0.16 | 23.8             | 27.4    | <0.001                       | Yes                               | 52.3    | 74.2                  | 76.2   | 72.6   |            | Missing | 29.0                              |                           |      |         |        |         | Daycare         | No      | 62.1             | 88.4 | <0.001                 | 87.4 | 89.2   | <0.001          | Yes                       | 8.7     | 11.6 | 12.6   | 10.8   |                       | Missing | 29.2    |                              |                                   |      |      | Postnatal exposure to ETS |        | No                     | 24.4   | 82.9   | <0.001 | 83.8             | 82.2   | 0.003 | Yes                          | 6.6             | 17.1 | 16.2 | 17.8             |                           | Missing | 69.0   |                       |                           |        |        | Mold or dampness in the home | No      |                       | 12.9 | 41.3   | <0.001  | 38.9       | 43.1 | <0.001 | Yes                   | 16.8       | 58.7 | 61.1 | 56.9   |                              | Missing                      | 70.3 |                        |      |        |        | Gas stove in the home | No      | 27.7    |        | 92.5 | <0.001 | 92.9    | 92.2    | 0.05 | Yes                    | 3.1     | 7.5    | 7.1                          | 7.8    | Missing |                       | 69.2   |      |      |        | Wood stove in the home |        | No      | 18.3    |      | 57.0                      | <0.001 | 53.2 | 60.0                      | <0.001 | Yes                    | 12.5    | 43.0  | 46.8 | 40.0   | Missing | 69.2 |        |                        |      |      |      |        |                              |         |        |      |        |                           |      |        |                              |        |      |      |        |         |      |        |      |      |                       |      |      |      |        |                              |      |      |      |        |      |                       |        |         |      |        |      |      |                        |      |      |      |        |                       |      |        |      |         |      |      |      |         |                        |     |      |      |         |      |      |        |     |                        |      |      |      |         |      |      |        |     |      |      |      |      |         |      |
| Maternal asthma                   | No                          | 91.0                       | 91.8                       | <0.001               | 92.2                       | 91.6                      | 0.08                 |                                   |                        |      |      |        |      |      |        |                            |      |      |      |      |                                   |         |      |      |        |                              |      |        |                  |        |                  |           |        |                       |         |        |        |        |                                   |      |        |            |         |                              |      |        |                       |         |        |                |        |                 |      |        |            |         |                |      |      |                  |         |                              |                                   |         |                       |        |        |            |         |                                   |                           |      |         |        |         |                 |         |                  |      |                        |      |        |                 |                           |         |      |        |        |                       |         |         |                              |                                   |      |      |                           |        |                        |        |        |        |                  |        |       |                              |                 |      |      |                  |                           |         |        |                       |                           |        |        |                              |         |                       |      |        |         |            |      |        |                       |            |      |      |        |                              |                              |      |                        |      |        |        |                       |         |         |        |      |        |         |         |      |                        |         |        |                              |        |         |                       |        |      |      |        |                        |        |         |         |      |                           |        |      |                           |        |                        |         |       |      |        |         |      |        |                        |      |      |      |        |                              |         |        |      |        |                           |      |        |                              |        |      |      |        |         |      |        |      |      |                       |      |      |      |        |                              |      |      |      |        |      |                       |        |         |      |        |      |      |                        |      |      |      |        |                       |      |        |      |         |      |      |      |         |                        |     |      |      |         |      |      |        |     |                        |      |      |      |         |      |      |        |     |      |      |      |      |         |      |
|                                   | Yes                         | 9.0                        | 8.2                        |                      | 7.8                        | 8.4                       |                      | Child asthma (ICD-10)             | No                     | 91.6 | 93.3 | <0.001 | 93.4 | 93.2 | 0.51   | Yes                        | 8.4  | 6.7  | 6.6  | 6.8  | Pets in the home                  | No      | 54.9 | 58.6 | <0.001 | 52.1                         | 63.4 | <0.001 | Yes              | 45.0   | 41.4             | 47.9      | 36.6   |                       | Missing | 0.1    |        |        |                                   |      |        | Breast fed | No      | 18.7                         | 25.8 | 0.16   | 23.8                  | 27.4    | <0.001 | Yes            | 52.3   | 74.2            | 76.2 | 72.6   |            | Missing | 29.0           |      |      |                  |         |                              | Daycare                           | No      | 62.1                  | 88.4   | <0.001 | 87.4       | 89.2    | <0.001                            | Yes                       | 8.7  | 11.6    | 12.6   | 10.8    |                 | Missing | 29.2             |      |                        |      |        |                 | Postnatal exposure to ETS | No      | 24.4 | 82.9   | <0.001 | 83.8                  | 82.2    | 0.003   | Yes                          | 6.6                               | 17.1 | 16.2 |                           | 17.8   | Missing                | 69.0   |        |        |                  |        |       | Mold or dampness in the home | No              | 12.9 | 41.3 | <0.001           | 38.9                      | 43.1    | <0.001 | Yes                   | 16.8                      | 58.7   | 61.1   |                              | 56.9    | Missing               | 70.3 |        |         |            |      |        | Gas stove in the home | No         | 27.7 | 92.5 | <0.001 | 92.9                         | 92.2                         | 0.05 | Yes                    | 3.1  | 7.5    | 7.1    |                       | 7.8     | Missing | 69.2   |      |        |         |         |      | Wood stove in the home | No      | 18.3   | 57.0                         | <0.001 | 53.2    | 60.0                  | <0.001 | Yes  | 12.5 | 43.0   |                        | 46.8   | 40.0    | Missing | 69.2 |                           |        |      |                           |        |                        |         |       |      |        |         |      |        |                        |      |      |      |        |                              |         |        |      |        |                           |      |        |                              |        |      |      |        |         |      |        |      |      |                       |      |      |      |        |                              |      |      |      |        |      |                       |        |         |      |        |      |      |                        |      |      |      |        |                       |      |        |      |         |      |      |      |         |                        |     |      |      |         |      |      |        |     |                        |      |      |      |         |      |      |        |     |      |      |      |      |         |      |
| Child asthma (ICD-10)             | No                          | 91.6                       | 93.3                       | <0.001               | 93.4                       | 93.2                      | 0.51                 |                                   |                        |      |      |        |      |      |        |                            |      |      |      |      |                                   |         |      |      |        |                              |      |        |                  |        |                  |           |        |                       |         |        |        |        |                                   |      |        |            |         |                              |      |        |                       |         |        |                |        |                 |      |        |            |         |                |      |      |                  |         |                              |                                   |         |                       |        |        |            |         |                                   |                           |      |         |        |         |                 |         |                  |      |                        |      |        |                 |                           |         |      |        |        |                       |         |         |                              |                                   |      |      |                           |        |                        |        |        |        |                  |        |       |                              |                 |      |      |                  |                           |         |        |                       |                           |        |        |                              |         |                       |      |        |         |            |      |        |                       |            |      |      |        |                              |                              |      |                        |      |        |        |                       |         |         |        |      |        |         |         |      |                        |         |        |                              |        |         |                       |        |      |      |        |                        |        |         |         |      |                           |        |      |                           |        |                        |         |       |      |        |         |      |        |                        |      |      |      |        |                              |         |        |      |        |                           |      |        |                              |        |      |      |        |         |      |        |      |      |                       |      |      |      |        |                              |      |      |      |        |      |                       |        |         |      |        |      |      |                        |      |      |      |        |                       |      |        |      |         |      |      |      |         |                        |     |      |      |         |      |      |        |     |                        |      |      |      |         |      |      |        |     |      |      |      |      |         |      |
|                                   | Yes                         | 8.4                        | 6.7                        |                      | 6.6                        | 6.8                       |                      | Pets in the home                  | No                     | 54.9 | 58.6 | <0.001 | 52.1 | 63.4 | <0.001 | Yes                        | 45.0 | 41.4 | 47.9 | 36.6 |                                   | Missing | 0.1  |      |        |                              |      |        | Breast fed       | No     | 18.7             | 25.8      | 0.16   | 23.8                  | 27.4    | <0.001 | Yes    | 52.3   | 74.2                              | 76.2 | 72.6   |            | Missing | 29.0                         |      |        |                       |         |        | Daycare        | No     | 62.1            | 88.4 | <0.001 | 87.4       | 89.2    | <0.001         | Yes  | 8.7  | 11.6             | 12.6    | 10.8                         |                                   | Missing | 29.2                  |        |        |            |         |                                   | Postnatal exposure to ETS | No   | 24.4    | 82.9   | <0.001  | 83.8            | 82.2    | 0.003            | Yes  | 6.6                    | 17.1 | 16.2   | 17.8            |                           | Missing | 69.0 |        |        |                       |         |         | Mold or dampness in the home | No                                | 12.9 | 41.3 | <0.001                    | 38.9   | 43.1                   | <0.001 | Yes    | 16.8   | 58.7             | 61.1   | 56.9  |                              | Missing         | 70.3 |      |                  |                           |         |        | Gas stove in the home | No                        | 27.7   | 92.5   | <0.001                       | 92.9    | 92.2                  | 0.05 | Yes    | 3.1     | 7.5        | 7.1  | 7.8    |                       | Missing    | 69.2 |      |        |                              |                              |      | Wood stove in the home | No   | 18.3   | 57.0   | <0.001                | 53.2    | 60.0    | <0.001 | Yes  | 12.5   | 43.0    | 46.8    | 40.0 |                        | Missing | 69.2   |                              |        |         |                       |        |      |      |        |                        |        |         |         |      |                           |        |      |                           |        |                        |         |       |      |        |         |      |        |                        |      |      |      |        |                              |         |        |      |        |                           |      |        |                              |        |      |      |        |         |      |        |      |      |                       |      |      |      |        |                              |      |      |      |        |      |                       |        |         |      |        |      |      |                        |      |      |      |        |                       |      |        |      |         |      |      |      |         |                        |     |      |      |         |      |      |        |     |                        |      |      |      |         |      |      |        |     |      |      |      |      |         |      |
| Pets in the home                  | No                          | 54.9                       | 58.6                       | <0.001               | 52.1                       | 63.4                      | <0.001               |                                   |                        |      |      |        |      |      |        |                            |      |      |      |      |                                   |         |      |      |        |                              |      |        |                  |        |                  |           |        |                       |         |        |        |        |                                   |      |        |            |         |                              |      |        |                       |         |        |                |        |                 |      |        |            |         |                |      |      |                  |         |                              |                                   |         |                       |        |        |            |         |                                   |                           |      |         |        |         |                 |         |                  |      |                        |      |        |                 |                           |         |      |        |        |                       |         |         |                              |                                   |      |      |                           |        |                        |        |        |        |                  |        |       |                              |                 |      |      |                  |                           |         |        |                       |                           |        |        |                              |         |                       |      |        |         |            |      |        |                       |            |      |      |        |                              |                              |      |                        |      |        |        |                       |         |         |        |      |        |         |         |      |                        |         |        |                              |        |         |                       |        |      |      |        |                        |        |         |         |      |                           |        |      |                           |        |                        |         |       |      |        |         |      |        |                        |      |      |      |        |                              |         |        |      |        |                           |      |        |                              |        |      |      |        |         |      |        |      |      |                       |      |      |      |        |                              |      |      |      |        |      |                       |        |         |      |        |      |      |                        |      |      |      |        |                       |      |        |      |         |      |      |      |         |                        |     |      |      |         |      |      |        |     |                        |      |      |      |         |      |      |        |     |      |      |      |      |         |      |
|                                   | Yes                         | 45.0                       | 41.4                       |                      | 47.9                       | 36.6                      |                      |                                   |                        |      |      |        |      |      |        |                            |      |      |      |      |                                   |         |      |      |        |                              |      |        |                  |        |                  |           |        |                       |         |        |        |        |                                   |      |        |            |         |                              |      |        |                       |         |        |                |        |                 |      |        |            |         |                |      |      |                  |         |                              |                                   |         |                       |        |        |            |         |                                   |                           |      |         |        |         |                 |         |                  |      |                        |      |        |                 |                           |         |      |        |        |                       |         |         |                              |                                   |      |      |                           |        |                        |        |        |        |                  |        |       |                              |                 |      |      |                  |                           |         |        |                       |                           |        |        |                              |         |                       |      |        |         |            |      |        |                       |            |      |      |        |                              |                              |      |                        |      |        |        |                       |         |         |        |      |        |         |         |      |                        |         |        |                              |        |         |                       |        |      |      |        |                        |        |         |         |      |                           |        |      |                           |        |                        |         |       |      |        |         |      |        |                        |      |      |      |        |                              |         |        |      |        |                           |      |        |                              |        |      |      |        |         |      |        |      |      |                       |      |      |      |        |                              |      |      |      |        |      |                       |        |         |      |        |      |      |                        |      |      |      |        |                       |      |        |      |         |      |      |      |         |                        |     |      |      |         |      |      |        |     |                        |      |      |      |         |      |      |        |     |      |      |      |      |         |      |
|                                   | Missing                     | 0.1                        |                            |                      |                            |                           |                      | Breast fed                        | No                     | 18.7 | 25.8 | 0.16   | 23.8 | 27.4 | <0.001 | Yes                        | 52.3 | 74.2 | 76.2 | 72.6 | Missing                           | 29.0    |      |      |        | Daycare                      | No   | 62.1   | 88.4             | <0.001 | 87.4             | 89.2      | <0.001 | Yes                   | 8.7     | 11.6   | 12.6   | 10.8   | Missing                           | 29.2 |        |            |         | Postnatal exposure to ETS    | No   | 24.4   | 82.9                  | <0.001  | 83.8   | 82.2           | 0.003  | Yes             | 6.6  | 17.1   | 16.2       | 17.8    | Missing        | 69.0 |      |                  |         | Mold or dampness in the home | No                                | 12.9    | 41.3                  | <0.001 | 38.9   | 43.1       | <0.001  | Yes                               | 16.8                      | 58.7 | 61.1    | 56.9   | Missing | 70.3            |         |                  |      | Gas stove in the home  | No   | 27.7   | 92.5            | <0.001                    | 92.9    | 92.2 | 0.05   | Yes    | 3.1                   | 7.5     | 7.1     | 7.8                          | Missing                           | 69.2 |      |                           |        | Wood stove in the home | No     | 18.3   | 57.0   | <0.001           | 53.2   | 60.0  | <0.001                       | Yes             | 12.5 | 43.0 | 46.8             | 40.0                      | Missing | 69.2   |                       |                           |        |        |                              |         |                       |      |        |         |            |      |        |                       |            |      |      |        |                              |                              |      |                        |      |        |        |                       |         |         |        |      |        |         |         |      |                        |         |        |                              |        |         |                       |        |      |      |        |                        |        |         |         |      |                           |        |      |                           |        |                        |         |       |      |        |         |      |        |                        |      |      |      |        |                              |         |        |      |        |                           |      |        |                              |        |      |      |        |         |      |        |      |      |                       |      |      |      |        |                              |      |      |      |        |      |                       |        |         |      |        |      |      |                        |      |      |      |        |                       |      |        |      |         |      |      |      |         |                        |     |      |      |         |      |      |        |     |                        |      |      |      |         |      |      |        |     |      |      |      |      |         |      |
| Breast fed                        | No                          | 18.7                       | 25.8                       | 0.16                 | 23.8                       | 27.4                      | <0.001               |                                   |                        |      |      |        |      |      |        |                            |      |      |      |      |                                   |         |      |      |        |                              |      |        |                  |        |                  |           |        |                       |         |        |        |        |                                   |      |        |            |         |                              |      |        |                       |         |        |                |        |                 |      |        |            |         |                |      |      |                  |         |                              |                                   |         |                       |        |        |            |         |                                   |                           |      |         |        |         |                 |         |                  |      |                        |      |        |                 |                           |         |      |        |        |                       |         |         |                              |                                   |      |      |                           |        |                        |        |        |        |                  |        |       |                              |                 |      |      |                  |                           |         |        |                       |                           |        |        |                              |         |                       |      |        |         |            |      |        |                       |            |      |      |        |                              |                              |      |                        |      |        |        |                       |         |         |        |      |        |         |         |      |                        |         |        |                              |        |         |                       |        |      |      |        |                        |        |         |         |      |                           |        |      |                           |        |                        |         |       |      |        |         |      |        |                        |      |      |      |        |                              |         |        |      |        |                           |      |        |                              |        |      |      |        |         |      |        |      |      |                       |      |      |      |        |                              |      |      |      |        |      |                       |        |         |      |        |      |      |                        |      |      |      |        |                       |      |        |      |         |      |      |      |         |                        |     |      |      |         |      |      |        |     |                        |      |      |      |         |      |      |        |     |      |      |      |      |         |      |
|                                   | Yes                         | 52.3                       | 74.2                       |                      | 76.2                       | 72.6                      |                      |                                   |                        |      |      |        |      |      |        |                            |      |      |      |      |                                   |         |      |      |        |                              |      |        |                  |        |                  |           |        |                       |         |        |        |        |                                   |      |        |            |         |                              |      |        |                       |         |        |                |        |                 |      |        |            |         |                |      |      |                  |         |                              |                                   |         |                       |        |        |            |         |                                   |                           |      |         |        |         |                 |         |                  |      |                        |      |        |                 |                           |         |      |        |        |                       |         |         |                              |                                   |      |      |                           |        |                        |        |        |        |                  |        |       |                              |                 |      |      |                  |                           |         |        |                       |                           |        |        |                              |         |                       |      |        |         |            |      |        |                       |            |      |      |        |                              |                              |      |                        |      |        |        |                       |         |         |        |      |        |         |         |      |                        |         |        |                              |        |         |                       |        |      |      |        |                        |        |         |         |      |                           |        |      |                           |        |                        |         |       |      |        |         |      |        |                        |      |      |      |        |                              |         |        |      |        |                           |      |        |                              |        |      |      |        |         |      |        |      |      |                       |      |      |      |        |                              |      |      |      |        |      |                       |        |         |      |        |      |      |                        |      |      |      |        |                       |      |        |      |         |      |      |      |         |                        |     |      |      |         |      |      |        |     |                        |      |      |      |         |      |      |        |     |      |      |      |      |         |      |
|                                   | Missing                     | 29.0                       |                            |                      |                            |                           |                      | Daycare                           | No                     | 62.1 | 88.4 | <0.001 | 87.4 | 89.2 | <0.001 | Yes                        | 8.7  | 11.6 | 12.6 | 10.8 | Missing                           | 29.2    |      |      |        | Postnatal exposure to ETS    | No   | 24.4   | 82.9             | <0.001 | 83.8             | 82.2      | 0.003  | Yes                   | 6.6     | 17.1   | 16.2   | 17.8   | Missing                           | 69.0 |        |            |         | Mold or dampness in the home | No   | 12.9   | 41.3                  | <0.001  | 38.9   | 43.1           | <0.001 | Yes             | 16.8 | 58.7   | 61.1       | 56.9    | Missing        | 70.3 |      |                  |         | Gas stove in the home        | No                                | 27.7    | 92.5                  | <0.001 | 92.9   | 92.2       | 0.05    | Yes                               | 3.1                       | 7.5  | 7.1     | 7.8    | Missing | 69.2            |         |                  |      | Wood stove in the home | No   | 18.3   | 57.0            | <0.001                    | 53.2    | 60.0 | <0.001 | Yes    | 12.5                  | 43.0    | 46.8    | 40.0                         | Missing                           | 69.2 |      |                           |        |                        |        |        |        |                  |        |       |                              |                 |      |      |                  |                           |         |        |                       |                           |        |        |                              |         |                       |      |        |         |            |      |        |                       |            |      |      |        |                              |                              |      |                        |      |        |        |                       |         |         |        |      |        |         |         |      |                        |         |        |                              |        |         |                       |        |      |      |        |                        |        |         |         |      |                           |        |      |                           |        |                        |         |       |      |        |         |      |        |                        |      |      |      |        |                              |         |        |      |        |                           |      |        |                              |        |      |      |        |         |      |        |      |      |                       |      |      |      |        |                              |      |      |      |        |      |                       |        |         |      |        |      |      |                        |      |      |      |        |                       |      |        |      |         |      |      |      |         |                        |     |      |      |         |      |      |        |     |                        |      |      |      |         |      |      |        |     |      |      |      |      |         |      |
| Daycare                           | No                          | 62.1                       | 88.4                       | <0.001               | 87.4                       | 89.2                      | <0.001               |                                   |                        |      |      |        |      |      |        |                            |      |      |      |      |                                   |         |      |      |        |                              |      |        |                  |        |                  |           |        |                       |         |        |        |        |                                   |      |        |            |         |                              |      |        |                       |         |        |                |        |                 |      |        |            |         |                |      |      |                  |         |                              |                                   |         |                       |        |        |            |         |                                   |                           |      |         |        |         |                 |         |                  |      |                        |      |        |                 |                           |         |      |        |        |                       |         |         |                              |                                   |      |      |                           |        |                        |        |        |        |                  |        |       |                              |                 |      |      |                  |                           |         |        |                       |                           |        |        |                              |         |                       |      |        |         |            |      |        |                       |            |      |      |        |                              |                              |      |                        |      |        |        |                       |         |         |        |      |        |         |         |      |                        |         |        |                              |        |         |                       |        |      |      |        |                        |        |         |         |      |                           |        |      |                           |        |                        |         |       |      |        |         |      |        |                        |      |      |      |        |                              |         |        |      |        |                           |      |        |                              |        |      |      |        |         |      |        |      |      |                       |      |      |      |        |                              |      |      |      |        |      |                       |        |         |      |        |      |      |                        |      |      |      |        |                       |      |        |      |         |      |      |      |         |                        |     |      |      |         |      |      |        |     |                        |      |      |      |         |      |      |        |     |      |      |      |      |         |      |
|                                   | Yes                         | 8.7                        | 11.6                       |                      | 12.6                       | 10.8                      |                      |                                   |                        |      |      |        |      |      |        |                            |      |      |      |      |                                   |         |      |      |        |                              |      |        |                  |        |                  |           |        |                       |         |        |        |        |                                   |      |        |            |         |                              |      |        |                       |         |        |                |        |                 |      |        |            |         |                |      |      |                  |         |                              |                                   |         |                       |        |        |            |         |                                   |                           |      |         |        |         |                 |         |                  |      |                        |      |        |                 |                           |         |      |        |        |                       |         |         |                              |                                   |      |      |                           |        |                        |        |        |        |                  |        |       |                              |                 |      |      |                  |                           |         |        |                       |                           |        |        |                              |         |                       |      |        |         |            |      |        |                       |            |      |      |        |                              |                              |      |                        |      |        |        |                       |         |         |        |      |        |         |         |      |                        |         |        |                              |        |         |                       |        |      |      |        |                        |        |         |         |      |                           |        |      |                           |        |                        |         |       |      |        |         |      |        |                        |      |      |      |        |                              |         |        |      |        |                           |      |        |                              |        |      |      |        |         |      |        |      |      |                       |      |      |      |        |                              |      |      |      |        |      |                       |        |         |      |        |      |      |                        |      |      |      |        |                       |      |        |      |         |      |      |      |         |                        |     |      |      |         |      |      |        |     |                        |      |      |      |         |      |      |        |     |      |      |      |      |         |      |
|                                   | Missing                     | 29.2                       |                            |                      |                            |                           |                      | Postnatal exposure to ETS         | No                     | 24.4 | 82.9 | <0.001 | 83.8 | 82.2 | 0.003  | Yes                        | 6.6  | 17.1 | 16.2 | 17.8 | Missing                           | 69.0    |      |      |        | Mold or dampness in the home | No   | 12.9   | 41.3             | <0.001 | 38.9             | 43.1      | <0.001 | Yes                   | 16.8    | 58.7   | 61.1   | 56.9   | Missing                           | 70.3 |        |            |         | Gas stove in the home        | No   | 27.7   | 92.5                  | <0.001  | 92.9   | 92.2           | 0.05   | Yes             | 3.1  | 7.5    | 7.1        | 7.8     | Missing        | 69.2 |      |                  |         | Wood stove in the home       | No                                | 18.3    | 57.0                  | <0.001 | 53.2   | 60.0       | <0.001  | Yes                               | 12.5                      | 43.0 | 46.8    | 40.0   | Missing | 69.2            |         |                  |      |                        |      |        |                 |                           |         |      |        |        |                       |         |         |                              |                                   |      |      |                           |        |                        |        |        |        |                  |        |       |                              |                 |      |      |                  |                           |         |        |                       |                           |        |        |                              |         |                       |      |        |         |            |      |        |                       |            |      |      |        |                              |                              |      |                        |      |        |        |                       |         |         |        |      |        |         |         |      |                        |         |        |                              |        |         |                       |        |      |      |        |                        |        |         |         |      |                           |        |      |                           |        |                        |         |       |      |        |         |      |        |                        |      |      |      |        |                              |         |        |      |        |                           |      |        |                              |        |      |      |        |         |      |        |      |      |                       |      |      |      |        |                              |      |      |      |        |      |                       |        |         |      |        |      |      |                        |      |      |      |        |                       |      |        |      |         |      |      |      |         |                        |     |      |      |         |      |      |        |     |                        |      |      |      |         |      |      |        |     |      |      |      |      |         |      |
| Postnatal exposure to ETS         | No                          | 24.4                       | 82.9                       | <0.001               | 83.8                       | 82.2                      | 0.003                |                                   |                        |      |      |        |      |      |        |                            |      |      |      |      |                                   |         |      |      |        |                              |      |        |                  |        |                  |           |        |                       |         |        |        |        |                                   |      |        |            |         |                              |      |        |                       |         |        |                |        |                 |      |        |            |         |                |      |      |                  |         |                              |                                   |         |                       |        |        |            |         |                                   |                           |      |         |        |         |                 |         |                  |      |                        |      |        |                 |                           |         |      |        |        |                       |         |         |                              |                                   |      |      |                           |        |                        |        |        |        |                  |        |       |                              |                 |      |      |                  |                           |         |        |                       |                           |        |        |                              |         |                       |      |        |         |            |      |        |                       |            |      |      |        |                              |                              |      |                        |      |        |        |                       |         |         |        |      |        |         |         |      |                        |         |        |                              |        |         |                       |        |      |      |        |                        |        |         |         |      |                           |        |      |                           |        |                        |         |       |      |        |         |      |        |                        |      |      |      |        |                              |         |        |      |        |                           |      |        |                              |        |      |      |        |         |      |        |      |      |                       |      |      |      |        |                              |      |      |      |        |      |                       |        |         |      |        |      |      |                        |      |      |      |        |                       |      |        |      |         |      |      |      |         |                        |     |      |      |         |      |      |        |     |                        |      |      |      |         |      |      |        |     |      |      |      |      |         |      |
|                                   | Yes                         | 6.6                        | 17.1                       |                      | 16.2                       | 17.8                      |                      |                                   |                        |      |      |        |      |      |        |                            |      |      |      |      |                                   |         |      |      |        |                              |      |        |                  |        |                  |           |        |                       |         |        |        |        |                                   |      |        |            |         |                              |      |        |                       |         |        |                |        |                 |      |        |            |         |                |      |      |                  |         |                              |                                   |         |                       |        |        |            |         |                                   |                           |      |         |        |         |                 |         |                  |      |                        |      |        |                 |                           |         |      |        |        |                       |         |         |                              |                                   |      |      |                           |        |                        |        |        |        |                  |        |       |                              |                 |      |      |                  |                           |         |        |                       |                           |        |        |                              |         |                       |      |        |         |            |      |        |                       |            |      |      |        |                              |                              |      |                        |      |        |        |                       |         |         |        |      |        |         |         |      |                        |         |        |                              |        |         |                       |        |      |      |        |                        |        |         |         |      |                           |        |      |                           |        |                        |         |       |      |        |         |      |        |                        |      |      |      |        |                              |         |        |      |        |                           |      |        |                              |        |      |      |        |         |      |        |      |      |                       |      |      |      |        |                              |      |      |      |        |      |                       |        |         |      |        |      |      |                        |      |      |      |        |                       |      |        |      |         |      |      |      |         |                        |     |      |      |         |      |      |        |     |                        |      |      |      |         |      |      |        |     |      |      |      |      |         |      |
|                                   | Missing                     | 69.0                       |                            |                      |                            |                           |                      | Mold or dampness in the home      | No                     | 12.9 | 41.3 | <0.001 | 38.9 | 43.1 | <0.001 | Yes                        | 16.8 | 58.7 | 61.1 | 56.9 | Missing                           | 70.3    |      |      |        | Gas stove in the home        | No   | 27.7   | 92.5             | <0.001 | 92.9             | 92.2      | 0.05   | Yes                   | 3.1     | 7.5    | 7.1    | 7.8    | Missing                           | 69.2 |        |            |         | Wood stove in the home       | No   | 18.3   | 57.0                  | <0.001  | 53.2   | 60.0           | <0.001 | Yes             | 12.5 | 43.0   | 46.8       | 40.0    | Missing        | 69.2 |      |                  |         |                              |                                   |         |                       |        |        |            |         |                                   |                           |      |         |        |         |                 |         |                  |      |                        |      |        |                 |                           |         |      |        |        |                       |         |         |                              |                                   |      |      |                           |        |                        |        |        |        |                  |        |       |                              |                 |      |      |                  |                           |         |        |                       |                           |        |        |                              |         |                       |      |        |         |            |      |        |                       |            |      |      |        |                              |                              |      |                        |      |        |        |                       |         |         |        |      |        |         |         |      |                        |         |        |                              |        |         |                       |        |      |      |        |                        |        |         |         |      |                           |        |      |                           |        |                        |         |       |      |        |         |      |        |                        |      |      |      |        |                              |         |        |      |        |                           |      |        |                              |        |      |      |        |         |      |        |      |      |                       |      |      |      |        |                              |      |      |      |        |      |                       |        |         |      |        |      |      |                        |      |      |      |        |                       |      |        |      |         |      |      |      |         |                        |     |      |      |         |      |      |        |     |                        |      |      |      |         |      |      |        |     |      |      |      |      |         |      |
| Mold or dampness in the home      | No                          | 12.9                       | 41.3                       | <0.001               | 38.9                       | 43.1                      | <0.001               |                                   |                        |      |      |        |      |      |        |                            |      |      |      |      |                                   |         |      |      |        |                              |      |        |                  |        |                  |           |        |                       |         |        |        |        |                                   |      |        |            |         |                              |      |        |                       |         |        |                |        |                 |      |        |            |         |                |      |      |                  |         |                              |                                   |         |                       |        |        |            |         |                                   |                           |      |         |        |         |                 |         |                  |      |                        |      |        |                 |                           |         |      |        |        |                       |         |         |                              |                                   |      |      |                           |        |                        |        |        |        |                  |        |       |                              |                 |      |      |                  |                           |         |        |                       |                           |        |        |                              |         |                       |      |        |         |            |      |        |                       |            |      |      |        |                              |                              |      |                        |      |        |        |                       |         |         |        |      |        |         |         |      |                        |         |        |                              |        |         |                       |        |      |      |        |                        |        |         |         |      |                           |        |      |                           |        |                        |         |       |      |        |         |      |        |                        |      |      |      |        |                              |         |        |      |        |                           |      |        |                              |        |      |      |        |         |      |        |      |      |                       |      |      |      |        |                              |      |      |      |        |      |                       |        |         |      |        |      |      |                        |      |      |      |        |                       |      |        |      |         |      |      |      |         |                        |     |      |      |         |      |      |        |     |                        |      |      |      |         |      |      |        |     |      |      |      |      |         |      |
|                                   | Yes                         | 16.8                       | 58.7                       |                      | 61.1                       | 56.9                      |                      |                                   |                        |      |      |        |      |      |        |                            |      |      |      |      |                                   |         |      |      |        |                              |      |        |                  |        |                  |           |        |                       |         |        |        |        |                                   |      |        |            |         |                              |      |        |                       |         |        |                |        |                 |      |        |            |         |                |      |      |                  |         |                              |                                   |         |                       |        |        |            |         |                                   |                           |      |         |        |         |                 |         |                  |      |                        |      |        |                 |                           |         |      |        |        |                       |         |         |                              |                                   |      |      |                           |        |                        |        |        |        |                  |        |       |                              |                 |      |      |                  |                           |         |        |                       |                           |        |        |                              |         |                       |      |        |         |            |      |        |                       |            |      |      |        |                              |                              |      |                        |      |        |        |                       |         |         |        |      |        |         |         |      |                        |         |        |                              |        |         |                       |        |      |      |        |                        |        |         |         |      |                           |        |      |                           |        |                        |         |       |      |        |         |      |        |                        |      |      |      |        |                              |         |        |      |        |                           |      |        |                              |        |      |      |        |         |      |        |      |      |                       |      |      |      |        |                              |      |      |      |        |      |                       |        |         |      |        |      |      |                        |      |      |      |        |                       |      |        |      |         |      |      |      |         |                        |     |      |      |         |      |      |        |     |                        |      |      |      |         |      |      |        |     |      |      |      |      |         |      |
|                                   | Missing                     | 70.3                       |                            |                      |                            |                           |                      | Gas stove in the home             | No                     | 27.7 | 92.5 | <0.001 | 92.9 | 92.2 | 0.05   | Yes                        | 3.1  | 7.5  | 7.1  | 7.8  | Missing                           | 69.2    |      |      |        | Wood stove in the home       | No   | 18.3   | 57.0             | <0.001 | 53.2             | 60.0      | <0.001 | Yes                   | 12.5    | 43.0   | 46.8   | 40.0   | Missing                           | 69.2 |        |            |         |                              |      |        |                       |         |        |                |        |                 |      |        |            |         |                |      |      |                  |         |                              |                                   |         |                       |        |        |            |         |                                   |                           |      |         |        |         |                 |         |                  |      |                        |      |        |                 |                           |         |      |        |        |                       |         |         |                              |                                   |      |      |                           |        |                        |        |        |        |                  |        |       |                              |                 |      |      |                  |                           |         |        |                       |                           |        |        |                              |         |                       |      |        |         |            |      |        |                       |            |      |      |        |                              |                              |      |                        |      |        |        |                       |         |         |        |      |        |         |         |      |                        |         |        |                              |        |         |                       |        |      |      |        |                        |        |         |         |      |                           |        |      |                           |        |                        |         |       |      |        |         |      |        |                        |      |      |      |        |                              |         |        |      |        |                           |      |        |                              |        |      |      |        |         |      |        |      |      |                       |      |      |      |        |                              |      |      |      |        |      |                       |        |         |      |        |      |      |                        |      |      |      |        |                       |      |        |      |         |      |      |      |         |                        |     |      |      |         |      |      |        |     |                        |      |      |      |         |      |      |        |     |      |      |      |      |         |      |
| Gas stove in the home             | No                          | 27.7                       | 92.5                       | <0.001               | 92.9                       | 92.2                      | 0.05                 |                                   |                        |      |      |        |      |      |        |                            |      |      |      |      |                                   |         |      |      |        |                              |      |        |                  |        |                  |           |        |                       |         |        |        |        |                                   |      |        |            |         |                              |      |        |                       |         |        |                |        |                 |      |        |            |         |                |      |      |                  |         |                              |                                   |         |                       |        |        |            |         |                                   |                           |      |         |        |         |                 |         |                  |      |                        |      |        |                 |                           |         |      |        |        |                       |         |         |                              |                                   |      |      |                           |        |                        |        |        |        |                  |        |       |                              |                 |      |      |                  |                           |         |        |                       |                           |        |        |                              |         |                       |      |        |         |            |      |        |                       |            |      |      |        |                              |                              |      |                        |      |        |        |                       |         |         |        |      |        |         |         |      |                        |         |        |                              |        |         |                       |        |      |      |        |                        |        |         |         |      |                           |        |      |                           |        |                        |         |       |      |        |         |      |        |                        |      |      |      |        |                              |         |        |      |        |                           |      |        |                              |        |      |      |        |         |      |        |      |      |                       |      |      |      |        |                              |      |      |      |        |      |                       |        |         |      |        |      |      |                        |      |      |      |        |                       |      |        |      |         |      |      |      |         |                        |     |      |      |         |      |      |        |     |                        |      |      |      |         |      |      |        |     |      |      |      |      |         |      |
|                                   | Yes                         | 3.1                        | 7.5                        |                      | 7.1                        | 7.8                       |                      |                                   |                        |      |      |        |      |      |        |                            |      |      |      |      |                                   |         |      |      |        |                              |      |        |                  |        |                  |           |        |                       |         |        |        |        |                                   |      |        |            |         |                              |      |        |                       |         |        |                |        |                 |      |        |            |         |                |      |      |                  |         |                              |                                   |         |                       |        |        |            |         |                                   |                           |      |         |        |         |                 |         |                  |      |                        |      |        |                 |                           |         |      |        |        |                       |         |         |                              |                                   |      |      |                           |        |                        |        |        |        |                  |        |       |                              |                 |      |      |                  |                           |         |        |                       |                           |        |        |                              |         |                       |      |        |         |            |      |        |                       |            |      |      |        |                              |                              |      |                        |      |        |        |                       |         |         |        |      |        |         |         |      |                        |         |        |                              |        |         |                       |        |      |      |        |                        |        |         |         |      |                           |        |      |                           |        |                        |         |       |      |        |         |      |        |                        |      |      |      |        |                              |         |        |      |        |                           |      |        |                              |        |      |      |        |         |      |        |      |      |                       |      |      |      |        |                              |      |      |      |        |      |                       |        |         |      |        |      |      |                        |      |      |      |        |                       |      |        |      |         |      |      |      |         |                        |     |      |      |         |      |      |        |     |                        |      |      |      |         |      |      |        |     |      |      |      |      |         |      |
|                                   | Missing                     | 69.2                       |                            |                      |                            |                           |                      | Wood stove in the home            | No                     | 18.3 | 57.0 | <0.001 | 53.2 | 60.0 | <0.001 | Yes                        | 12.5 | 43.0 | 46.8 | 40.0 | Missing                           | 69.2    |      |      |        |                              |      |        |                  |        |                  |           |        |                       |         |        |        |        |                                   |      |        |            |         |                              |      |        |                       |         |        |                |        |                 |      |        |            |         |                |      |      |                  |         |                              |                                   |         |                       |        |        |            |         |                                   |                           |      |         |        |         |                 |         |                  |      |                        |      |        |                 |                           |         |      |        |        |                       |         |         |                              |                                   |      |      |                           |        |                        |        |        |        |                  |        |       |                              |                 |      |      |                  |                           |         |        |                       |                           |        |        |                              |         |                       |      |        |         |            |      |        |                       |            |      |      |        |                              |                              |      |                        |      |        |        |                       |         |         |        |      |        |         |         |      |                        |         |        |                              |        |         |                       |        |      |      |        |                        |        |         |         |      |                           |        |      |                           |        |                        |         |       |      |        |         |      |        |                        |      |      |      |        |                              |         |        |      |        |                           |      |        |                              |        |      |      |        |         |      |        |      |      |                       |      |      |      |        |                              |      |      |      |        |      |                       |        |         |      |        |      |      |                        |      |      |      |        |                       |      |        |      |         |      |      |      |         |                        |     |      |      |         |      |      |        |     |                        |      |      |      |         |      |      |        |     |      |      |      |      |         |      |
| Wood stove in the home            | No                          | 18.3                       | 57.0                       | <0.001               | 53.2                       | 60.0                      | <0.001               |                                   |                        |      |      |        |      |      |        |                            |      |      |      |      |                                   |         |      |      |        |                              |      |        |                  |        |                  |           |        |                       |         |        |        |        |                                   |      |        |            |         |                              |      |        |                       |         |        |                |        |                 |      |        |            |         |                |      |      |                  |         |                              |                                   |         |                       |        |        |            |         |                                   |                           |      |         |        |         |                 |         |                  |      |                        |      |        |                 |                           |         |      |        |        |                       |         |         |                              |                                   |      |      |                           |        |                        |        |        |        |                  |        |       |                              |                 |      |      |                  |                           |         |        |                       |                           |        |        |                              |         |                       |      |        |         |            |      |        |                       |            |      |      |        |                              |                              |      |                        |      |        |        |                       |         |         |        |      |        |         |         |      |                        |         |        |                              |        |         |                       |        |      |      |        |                        |        |         |         |      |                           |        |      |                           |        |                        |         |       |      |        |         |      |        |                        |      |      |      |        |                              |         |        |      |        |                           |      |        |                              |        |      |      |        |         |      |        |      |      |                       |      |      |      |        |                              |      |      |      |        |      |                       |        |         |      |        |      |      |                        |      |      |      |        |                       |      |        |      |         |      |      |      |         |                        |     |      |      |         |      |      |        |     |                        |      |      |      |         |      |      |        |     |      |      |      |      |         |      |
|                                   | Yes                         | 12.5                       | 43.0                       |                      | 46.8                       | 40.0                      |                      |                                   |                        |      |      |        |      |      |        |                            |      |      |      |      |                                   |         |      |      |        |                              |      |        |                  |        |                  |           |        |                       |         |        |        |        |                                   |      |        |            |         |                              |      |        |                       |         |        |                |        |                 |      |        |            |         |                |      |      |                  |         |                              |                                   |         |                       |        |        |            |         |                                   |                           |      |         |        |         |                 |         |                  |      |                        |      |        |                 |                           |         |      |        |        |                       |         |         |                              |                                   |      |      |                           |        |                        |        |        |        |                  |        |       |                              |                 |      |      |                  |                           |         |        |                       |                           |        |        |                              |         |                       |      |        |         |            |      |        |                       |            |      |      |        |                              |                              |      |                        |      |        |        |                       |         |         |        |      |        |         |         |      |                        |         |        |                              |        |         |                       |        |      |      |        |                        |        |         |         |      |                           |        |      |                           |        |                        |         |       |      |        |         |      |        |                        |      |      |      |        |                              |         |        |      |        |                           |      |        |                              |        |      |      |        |         |      |        |      |      |                       |      |      |      |        |                              |      |      |      |        |      |                       |        |         |      |        |      |      |                        |      |      |      |        |                       |      |        |      |         |      |      |      |         |                        |     |      |      |         |      |      |        |     |                        |      |      |      |         |      |      |        |     |      |      |      |      |         |      |
|                                   | Missing                     | 69.2                       |                            |                      |                            |                           |                      |                                   |                        |      |      |        |      |      |        |                            |      |      |      |      |                                   |         |      |      |        |                              |      |        |                  |        |                  |           |        |                       |         |        |        |        |                                   |      |        |            |         |                              |      |        |                       |         |        |                |        |                 |      |        |            |         |                |      |      |                  |         |                              |                                   |         |                       |        |        |            |         |                                   |                           |      |         |        |         |                 |         |                  |      |                        |      |        |                 |                           |         |      |        |        |                       |         |         |                              |                                   |      |      |                           |        |                        |        |        |        |                  |        |       |                              |                 |      |      |                  |                           |         |        |                       |                           |        |        |                              |         |                       |      |        |         |            |      |        |                       |            |      |      |        |                              |                              |      |                        |      |        |        |                       |         |         |        |      |        |         |         |      |                        |         |        |                              |        |         |                       |        |      |      |        |                        |        |         |         |      |                           |        |      |                           |        |                        |         |       |      |        |         |      |        |                        |      |      |      |        |                              |         |        |      |        |                           |      |        |                              |        |      |      |        |         |      |        |      |      |                       |      |      |      |        |                              |      |      |      |        |      |                       |        |         |      |        |      |      |                        |      |      |      |        |                       |      |        |      |         |      |      |      |         |                        |     |      |      |         |      |      |        |     |                        |      |      |      |         |      |      |        |     |      |      |      |      |         |      |

*Continues next page*

<sup>a</sup> Comparing included vs. excluded study population.

<sup>b</sup> Comparing nonmovers vs. movers.

ETS refers to environmental tobacco smoke

**Table A9 (continued).** Study Population Characteristics of Excluded vs. Included and Nonmovers vs. Movers of the Danish National Birth Cohort (DNBC)

| Pollutant                     | % Excluded<br>(N = 57,801) | % Included<br>(N = 22,084) | P value <sup>a</sup> | % Nonmovers<br>(N = 9,507) | % Movers<br>(N = 12,577) | P value <sup>b</sup> |
|-------------------------------|----------------------------|----------------------------|----------------------|----------------------------|--------------------------|----------------------|
| PM <sub>2.5</sub>             | 11.5 ± 1.5                 | 11.5 ± 1.4                 | 0.004                | 11.2 ± 1.3                 | 11.7 ± 1.5               | <0.001               |
| PM <sub>10</sub>              | 17.5 ± 1.9                 | 17.6 ± 1.8                 | <0.001               | 17.2 ± 1.4                 | 17.9 ± 2.0               | <0.001               |
| NO <sub>2</sub>               | 18.8 ± 7.5                 | 18.6 ± 7.3                 | 0.002                | 16.5 ± 5.4                 | 20.3 ± 8.0               | <0.001               |
| NO <sub>x</sub>               | 27.5 ± 20.3                | 26.9 ± 19.4                | <0.001               | 21.9 ± 12.7                | 30.7 ± 22.5              | <0.001               |
| EC                            | 0.8 ± 0.4                  | 0.8 ± 0.4                  | 0.54                 | 0.7 ± 0.3                  | 0.9 ± 0.4                | <0.001               |
| OC                            | 1.4 ± 0.3                  | 0.8 ± 0.4                  | <0.001               | 1.4 ± 0.3                  | 1.4 ± 0.3                | <0.001               |
| SO <sub>2</sub>               | 5.0 ± 2.3                  | 5.0 ± 2.3                  | 0.08                 | 4.6 ± 1.5                  | 5.3 ± 2.4                | <0.001               |
| O <sub>3</sub>                | 51.0 ± 7.4                 | 51.1 ± 7.2                 | <0.001               | 52.8 ± 6.3                 | 49.8 ± 7.6               | <0.001               |
| SO <sub>4</sub> <sup>2-</sup> | 2.1 ± 0.2                  | 2.1 ± 0.2                  | <0.001               | 2.1 ± 0.2                  | 2.1 ± 0.2                | <0.001               |
| NO <sub>3</sub> <sup>-</sup>  | 3.4 ± 0.5                  | 3.4 ± 0.5                  | <0.001               | 3.4 ± 0.5                  | 3.4 ± 0.5                | 0.02                 |
| NH <sub>4</sub> <sup>+</sup>  | 1.8 ± 0.9                  | 1.8 ± 0.9                  | <0.001               | 2.0 ± 0.9                  | 1.7 ± 0.8                | <0.001               |
| SOA                           | 0.3 ± 0.1                  | 0.3 ± 0.1                  | <0.001               | 0.3 ± 0.1                  | 0.3 ± 0.1                | <0.001               |
| Sea salt                      | 1.0 ± 0.2                  | 1.0 ± 0.2                  | <0.001               | 1.0 ± 0.2                  | 1.0 ± 0.2                | <0.001               |

<sup>a</sup> Comparing included vs. excluded study population.

<sup>b</sup> Comparing nonmovers vs. movers.

**Table A10. Sensitivity Analysis Restricted to Nonmovers of the Danish National Birth Cohort (DNBC)**

| Pollutant                     | Incidence <sup>a</sup>                             | Prevalence <sup>b</sup>                            |                                                      |
|-------------------------------|----------------------------------------------------|----------------------------------------------------|------------------------------------------------------|
|                               | (ICD-10)                                           | (Parental Recall)                                  |                                                      |
|                               | Asthma Ever<br>( <i>N</i> = 9,507; <i>n</i> = 623) | Asthma Ever<br>( <i>N</i> = 9,507; <i>n</i> = 883) | Active Asthma<br>( <i>N</i> = 9,507; <i>n</i> = 396) |
|                               | HR (95% CI)                                        | OR (95% CI)                                        | OR (95% CI)                                          |
| PM <sub>2.5</sub>             | 1.12 (0.89–1.41)                                   | 1.05 (0.74–1.49)                                   | 1.22 (0.73–2.02)                                     |
| PM <sub>10</sub>              | 1.21 (1.01–1.45)                                   | 1.12 (0.66–1.89)                                   | 1.20 (0.56–2.58)                                     |
| NO <sub>2</sub>               | 1.18 (0.98–1.44)                                   | 1.10 (0.93–1.29)                                   | 1.03 (0.80–1.31)                                     |
| NO <sub>x</sub>               | 1.08 (0.98–1.18)                                   | 1.07 (0.95–1.21)                                   | 0.98 (0.81–1.19)                                     |
| EC                            | 1.07 (0.95–1.21)                                   | 1.11 (0.83–1.49)                                   | 0.96 (0.62–1.48)                                     |
| OC                            | 0.97 (0.76–1.25)                                   | 1.05 (0.75–1.47)                                   | 1.14 (0.70–1.85)                                     |
| SO <sub>2</sub>               | 1.07 (0.95–1.20)                                   | 0.99 (0.95–1.03)                                   | 0.92 (0.75–1.14)                                     |
| O <sub>3</sub>                | 0.92 (0.79–1.08)                                   | 0.91 (0.79–1.06)                                   | 0.99 (0.94–1.05)                                     |
| SO <sub>4</sub> <sup>2-</sup> | 1.10 (0.71–1.71)                                   | 1.02 (0.67–1.57)                                   | 1.23 (0.66–2.31)                                     |
| NO <sub>3</sub> <sup>-</sup>  | 0.99 (0.83–1.18)                                   | 0.73 (0.30–1.77)                                   | 1.84 (0.51–6.68)                                     |
| NH <sub>4</sub> <sup>+</sup>  | 0.97 (0.74–1.26)                                   | 0.93 (0.59–1.45)                                   | 1.44 (0.75–2.76)                                     |
| SOA                           | 0.98 (0.85–1.13)                                   | 0.64 (0.24–1.69)                                   | 0.68 (0.17–2.72)                                     |
| Sea salt                      | 1.22 (1.01–1.47)                                   | 1.23 (0.68–2.22)                                   | 1.44 (0.61–3.40)                                     |

<sup>a</sup> Hazard ratio (HR) and 95% confidence intervals (CI) from Cox regression models per fixed increments of the time-weighted average exposures to ambient air pollutants for the full prenatal period of 2.4 for PM<sub>2.5</sub>, 2.7 for PM<sub>10</sub>, 8.7 for NO<sub>2</sub>, 13.4 for NO<sub>x</sub>, 0.3 for EC, 0.5 for OC, 2.7 for SO<sub>2</sub>, 8.5 for O<sub>3</sub>, 0.9 for SO<sub>4</sub><sup>2-</sup>, 0.6 for NO<sub>3</sub><sup>-</sup>, 0.4 for NH<sub>4</sub><sup>+</sup>, 0.1 for SOA and 0.2 for sea salt with age as the time dimension adjusted for year, household income, maternal education, parity, season of birth, smoking during pregnancy, municipality, maternal and paternal asthma, pets during pregnancy, house size at birth, breastfeeding, daycare, mold, dampness, environmental tobacco smoke, presence of gas stove, presence of wood stove, and candlelight burning in the home at age 11.

<sup>b</sup> Odds ratios (OR) and the 95% confidence intervals (CI) from logistic regression models with GEE for fixed increments (μg/m<sup>3</sup>) of the time-weighted average exposures to ambient air pollutants for the full prenatal period of 5 for PM<sub>2.5</sub>, 10 for PM<sub>10</sub>, 10 for NO<sub>2</sub>, 20 for NO<sub>x</sub>, 1 for EC, 1 for OC, 1 for SO<sub>2</sub>, 10 for O<sub>3</sub>, 1 for SO<sub>4</sub><sup>2-</sup>, 5 for NO<sub>3</sub><sup>-</sup>, 1 for NH<sub>4</sub><sup>+</sup>, 1 for SOA and 1 for sea salt with adjustment for sex, birth year, maternal education, income, parity, delivery season, maternal smoking during pregnancy, municipality, maternal and paternal asthma, pets during pregnancy, house size at birth, breastfeeding, daycare, mold, dampness, environmental tobacco smoke, presence of gas stove, presence of wood stove, and candlelight burning in the home at age 11.

**Table A11. Sensitivity Analysis Estimating Relative Risks and their 95% Confidence Intervals for the Associations between Prenatal and Postnatal Exposure to Air Pollution and Asthma (Parental Recall) Prevalence in the Danish National Birth Cohort (DNBC)<sup>a</sup>**

| Pollutants        | Asthma ever from birth to 7 years of age ( <i>n</i> = 2,188) |                                              |                                        | Active asthma at 7 years of age ( <i>n</i> = 978) |                                              |                                        |
|-------------------|--------------------------------------------------------------|----------------------------------------------|----------------------------------------|---------------------------------------------------|----------------------------------------------|----------------------------------------|
|                   | Prenatal exposure                                            | Postnatal exposure of the first year of life | Postnatal exposure from birth to age 7 | Prenatal exposure                                 | Postnatal exposure of the first year of life | Postnatal exposure from birth to age 7 |
|                   | RR (95% CI)                                                  | RR (95% CI)                                  | RR (95% CI)                            | RR (95% CI)                                       | RR (95% CI)                                  | RR (95% CI)                            |
| PM <sub>2.5</sub> | 0.87 (0.73–1.04)                                             | 1.05 (0.89–1.26)                             | 0.89 (0.68–1.15)                       | 0.93 (0.70–1.23)                                  | 1.03 (0.80–1.34)                             | 0.90 (0.62–1.32)                       |
| NO <sub>2</sub>   | 0.95 (0.89–1.03)                                             | 0.95 (0.89–1.03)                             | 0.95 (0.87–1.05)                       | 0.97 (0.87–1.08)                                  | 0.94 (0.84–1.05)                             | 0.86 (0.75–0.98)                       |

<sup>a</sup> Relative risks (RR) and the 95% confidence intervals (CI) from Poisson regression models with a robust error variance per 5- $\mu\text{g}/\text{m}^3$  increment for PM<sub>2.5</sub> and 10- $\mu\text{g}/\text{m}^3$  increment for NO<sub>2</sub> with adjustment for year, sex, household income, maternal education, parity, season of birth, smoking during pregnancy, municipality, maternal and paternal asthma, pets during pregnancy, house size at birth, breastfeeding, daycare, mold, dampness, environmental tobacco smoke, presence of gas stove, presence of wood stove, and candlelight burning in the home at age 11.
